# Supplementary material for: Synthesis of poly-functionalized benzofuransviaone-pot domino oxidation/[3+2] cyclization reactions of a hydroquinone ester and ynamides
Source: Royal Society of Chemistry journal article supplement (doi:10.1039/c9ra02144b), 2019-01-01
Supplement: c9ra02144b1.pdf [file c9ra02144b1.pdf]

## Supporting Information

### **Synthesis of poly-functionalized benzofurans via one-pot domino oxidation/[3+2] cyclization reactions of a hydroquinone ester and ynamides**

Dongxin Zhang\*, Jingjing Man, Yan Chen, Lei Yin, Junchao Zhong and Qian-Feng Zhang\*

*Institute of Molecular Engineering and Applied Chemistry, Anhui University of Technology,  
No. 59 Hudong Road, Ma'anshan 243002, China.  
E-mail: [dxzhang@ahut.edu.cn](mailto:dxzhang@ahut.edu.cn), [zhangqf@ahut.edu.cn](mailto:zhangqf@ahut.edu.cn)*

|                                                                       |    |
|-----------------------------------------------------------------------|----|
| 1. General -----                                                      | S2 |
| 2. Preparation of ynamides -----                                      | S2 |
| 3. Procedure for the oxidation of hydroquinone ester 5-----           | S3 |
| 4. Procedures for the one-pot domino oxidation/[3+2] cyclization----- | S3 |
| 5. References -----                                                   | S7 |
| 6. NMR spectra -----                                                  | S8 |

## 1. General

$^1\text{H}$  NMR and  $^{13}\text{C}$  NMR were recorded on a Bruker-400 MHz spectrometer. Proton chemical shifts are reported in ppm downfield from tetramethylsilane or from the residual solvent as internal standard in  $\text{CDCl}_3$  ( $\delta$  7.26 ppm). Carbon chemical shifts were internally referenced to the deuterated solvent signals in  $\text{CDCl}_3$  ( $\delta$  77.0 ppm). High-resolution mass spectra were recorded on a Thermo Scientific LTQ Orbitrap ESI ion trap mass spectrometer. Reagents obtained from commercial sources are used without further purification and all solvents were purified and dried according to standard methods prior to use, unless stated otherwise.

## 2. Preparation of ynamides

**General procedure for the preparation of ynamides 1.** Based on the literature procedures,<sup>1,2</sup> amide (3.0-4.0 mmol),  $\text{CuCl}_2$  (26.9 mg, 0.20 mmol), and  $\text{Na}_2\text{CO}_3$  (212.0 mg, 2.0 mmol) were combined in a 50 mL three-neck round-bottom flask. The flask was purged with  $\text{O}_2$  for 10 min and connected with a balloon filled with  $\text{O}_2$ . A solution of pyridine (160.0  $\mu\text{L}$ , 2.0 mmol) in 8.0 mL dry toluene was added to the reaction flask via a syringe and the flask was heated to 70  $^\circ\text{C}$ . A solution of alkyne (1.0 mmol) in 5.0 mL dry toluene was added to the flask slowly over a period of 3-4 h. After complete addition of the alkyne, the reaction mixture was allowed to stir at 70  $^\circ\text{C}$  for another 10 h. After cooling to room temperature, the crude mixture was filtered through a pad of Celite, concentrated by rotary evaporation, and purified by flash chromatography to provide the desired product, which was later stored in the freezer.

**Procedure for a 6 mmol-scale reaction for the synthesis of 1h.** Methyl indole-3-carboxylate (3.15 g, 18.0 mmol),  $\text{CuCl}_2$  (161.4 mg, 1.2 mmol), and  $\text{Na}_2\text{CO}_3$  (1.27 g, 12.0 mmol) were combined in a 250 mL three-neck round-bottom flask. The flask was purged with  $\text{O}_2$  for 10 min and connected with a balloon filled with  $\text{O}_2$ . A solution of pyridine (966.7  $\mu\text{L}$ , 12.0 mmol) in 45.0 mL dry toluene was added to the reaction flask via a syringe and the flask was heated to 70  $^\circ\text{C}$ . A solution of 1-heptyne (577.1 mg, 6.0 mmol) in 30.0 mL dry toluene was added to the flask slowly over a period of 4 h. After complete addition of the alkyne, the reaction mixture was allowed to stir at 70  $^\circ\text{C}$  for another 20 h. After cooling to room temperature, the crude mixture was filtered through a pad of Celite, concentrated by rotary evaporation, and purified by flash chromatography to provide **1h** (1.10 g, 68%).

Ynamides **1a**,<sup>1</sup> **1b**,<sup>1</sup> **1c**,<sup>2</sup> **1d**,<sup>1</sup> **1e**,<sup>1</sup> and **1g**<sup>1</sup> are known compounds and characterizations are the same as reported.

### 1-(Hept-1-yn-1-yl)azetidin-2-one (1f)

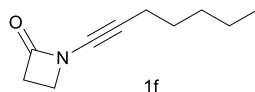

Synthesized by the general procedure; 138.7 mg (84%).

Yellow oil.  $^1\text{H}$  NMR (400 MHz,  $\text{CDCl}_3$ ):  $\delta$  = 0.87 (t,  $J$  = 6.8 Hz, 3H,  $\text{CH}_3$ ), 1.23-1.36 (m, 4H,  $\text{CH}_2 \times 2$ ), 1.45-1.52 (m, 2H,  $\text{CH}_2$ ), 2.25 (t,  $J$  = 7.2 Hz, 2H,  $\text{CH}_2$ ), 2.97 (t,  $J$  = 4.7 Hz, 2H,  $\text{CH}_2$ ), 3.55 (t,  $J$  = 4.8 Hz, 2H,  $\text{CH}_2$ ) ppm;  $^{13}\text{C}$  NMR (100 MHz,  $\text{CDCl}_3$ ):  $\delta$  = 13.9, 18.3, 22.1, 28.4,

30.9, 37.4, 42.8, 69.9, 70.2, 167.2 ppm. HRMS (ESI): calcd. for C<sub>10</sub>H<sub>16</sub>NO ([M + H]<sup>+</sup>) 166.1226, found 166.1228.

### Methyl 1-(hept-1-yn-1-yl)-1H-indole-3-carboxylate (**1h**)

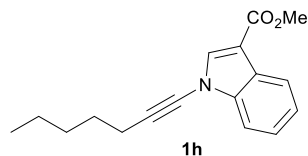

Synthesized by the general procedure; 177.7 mg (66%).

Colorless solid. <sup>1</sup>H NMR (400 MHz, CDCl<sub>3</sub>): δ = 0.95 (t, *J* = 7.1 Hz, 3H, CH<sub>3</sub>), 1.34-1.51 (m, 4H, CH<sub>2</sub> × 2), 1.62-1.68 (m, 2H, CH<sub>2</sub>), 2.47 (t, *J* = 7.0 Hz, 2H, CH<sub>2</sub>), 3.92 (s, 3H, CH<sub>3</sub>), 7.31-7.39 (m, 2H, ArH), 7.55 (d, *J* = 8.0 Hz, 1H, ArH), 7.89 (s, 1H, ArH), 8.16 (d, *J* = 7.4 Hz, 1H, ArH) ppm; <sup>13</sup>C NMR (100 MHz, CDCl<sub>3</sub>): δ = 14.0, 18.3, 22.2, 28.4, 31.0, 51.3, 70.5, 71.8, 109.8, 111.4, 121.7, 123.3, 124.1, 125.1, 135.2, 138.5, 164.5 ppm. HRMS (ESI): calcd. for C<sub>17</sub>H<sub>20</sub>NO<sub>2</sub> ([M + H]<sup>+</sup>) 270.1489, found 270.1490.

### 3. Procedure for the oxidation of hydroquinone ester **5**

According to literature procedure<sup>3</sup>, silver oxide (2.09 g, 9.0 mmol) and magnesium sulfate (1.08 g, 9.0 mmol) were added to a solution of methyl 2,5-dihydroxybenzoate (**5**) (504.5 mg, 3.0 mmol) in diethyl ether (50 mL). The reaction mixture was stirred at 25 °C for 3 h. After filtration through a pad of Celite, the filtrate was concentrated in vacuo and purified by flash chromatography to furnish the desired quinone ester **2b**. Characterizations are the same as reported.

**Oxidation using O<sub>2</sub> as the oxidant.** Hydroquinone ester **5** (20.2 mg, 0.12 mmol), MgSO<sub>4</sub> (28.9 mg, 0.24 mmol) were mixed in CH<sub>2</sub>Cl<sub>2</sub> (2.0 mL) under oxygen atmosphere (use of O<sub>2</sub> balloon). The reaction was stirred at room temperature (25 °C) for 8 h. TLC indicated that only small amount of **5** was oxidized, which indicated that O<sub>2</sub> is not a good oxidant for the oxidation of **5**.

### 4. Procedures for the one-pot domino oxidation/[3+2] cyclization

**General procedure for the one-pot domino oxidation/[3+2] cyclization.** Hydroquinone ester **5** (20.2 mg, 0.12 mmol), Ag<sub>2</sub>O (55.6 mg, 0.24 mmol) and MgSO<sub>4</sub> (28.9 mg, 0.24 mmol) were mixed in CH<sub>2</sub>Cl<sub>2</sub> (2.0 mL) and stirred at room temperature (25 °C) for 2 h. Then, ynamide **1** (0.1 mmol) and Sc(OTf)<sub>3</sub> (1.0 mg, 0.002 mmol) were added to the above mixture. All the reactions finished with 5 min. The crude reaction mixture was filtered through a pad of Celite, concentrated by rotary evaporation, and purified by flash chromatography to provide the desired product **3**.

**Procedure for a large scale one-pot reaction.** Hydroquinone ester **5** (1.23 g, 4.90 mmol), Ag<sub>2</sub>O (3.41 g, 14.7 mmol) and MgSO<sub>4</sub> (1.77 g, 14.7 mmol) were mixed in CH<sub>2</sub>Cl<sub>2</sub> (60.0 mL) and stirred at room temperature (25 °C) for 4 h. Ynamide **1h** (1.10 g, 4.08 mmol) and Sc(OTf)<sub>3</sub> (20.2 mg, 0.041 mmol) were added to the above mixture. The reaction was allowed to stir for 30 min. Then, the crude reaction mixture was filtered through a pad of Celite, concentrated by rotary evaporation, and purified by flash chromatography to provide the desired product **3h** (1.64 g, 92%).

**Methyl 2-((N,4-dimethylphenyl)sulfonamido)-5-hydroxy-3-phenylbenzofuran-4-carboxylate (3a)**

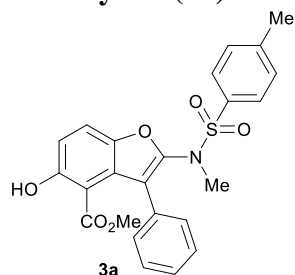

Synthesized by the general procedure; 40.9 mg (91%).

Light yellow solid.  $^1\text{H}$  NMR (400 MHz,  $\text{CDCl}_3$ ):  $\delta$  = 2.45 (s, 3H,  $\text{CH}_3$ ), 2.98 (s, 3H,  $\text{CH}_3$ ), 3.02 (s, 3H,  $\text{CH}_3$ ), 7.02 (d,  $J$  = 9.0 Hz, 1H, ArH), 7.27-7.42 (m, 7H, ArH), 7.53 (d,  $J$  = 9.0 Hz, 1H, ArH), 7.61 (d,  $J$  = 8.3 Hz, 2H, ArH), 10.8 (s, 1H, OH) ppm;  $^{13}\text{C}$  NMR (100 MHz,  $\text{CDCl}_3$ ):  $\delta$  = 21.6, 37.7, 51.0, 105.1, 115.7, 118.5, 119.4, 126.0, 127.0, 127.9, 128.2, 129.1, 129.6, 133.9, 135.0, 144.1, 146.0, 148.1, 159.1, 170.0 ppm; HRMS (ESI): calcd. for  $\text{C}_{24}\text{H}_{22}\text{NO}_6\text{S}$  ( $[\text{M} + \text{H}]^+$ ) 452.1162, found 452.1163.

**Methyl 2-((N,4-dimethylphenyl)sulfonamido)-5-hydroxy-3-(4-methoxyphenyl)benzofuran-4-carboxylate (3b)**

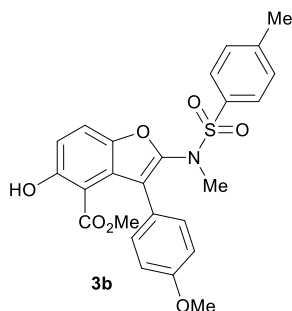

Synthesized by the general procedure; 42.3 mg (88%).

Light yellow solid.  $^1\text{H}$  NMR (400 MHz,  $\text{CDCl}_3$ ):  $\delta$  = 2.46 (s, 3H,  $\text{CH}_3$ ), 2.97 (s, 3H,  $\text{CH}_3$ ), 3.11 (s, 3H,  $\text{CH}_3$ ), 3.87 (s, 3H,  $\text{CH}_3$ ), 6.94 (d,  $J$  = 8.6 Hz, 2H, ArH), 7.01 (d,  $J$  = 9.0 Hz, 1H, ArH), 7.23-7.30 (m, 4H, ArH), 7.50 (d,  $J$  = 9.0 Hz, 1H, ArH), 7.64 (d,  $J$  = 8.2 Hz, 2H, ArH), 10.71 (s, 1H, OH) ppm;  $^{13}\text{C}$  NMR (100 MHz,  $\text{CDCl}_3$ ):  $\delta$  = 29.7, 37.7, 51.2, 55.3, 105.2, 113.3, 115.6, 118.4, 119.1, 124.1, 126.2, 128.2, 129.57, 129.58, 130.1, 135.2, 144.1, 146.0, 148.2, 159.1, 170.1 ppm; HRMS (ESI): calcd. for  $\text{C}_{25}\text{H}_{24}\text{NO}_7\text{S}$  ( $[\text{M} + \text{H}]^+$ ) 482.1268, found 482.1265.

**Methyl 2-((N,4-dimethylphenyl)sulfonamido)-5-hydroxy-3-pentylbenzofuran-4-carboxylate (3c)**

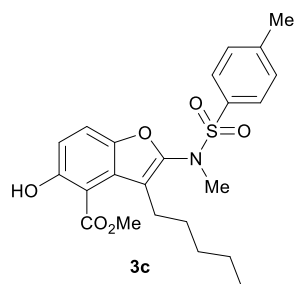

Synthesized by the general procedure; 41.8 mg (94%).

Light yellow solid.  $^1\text{H NMR}$  (400 MHz,  $\text{CDCl}_3$ ):  $\delta$  = 0.88 (t,  $J$  = 6.8 Hz, 3H,  $\text{CH}_3$ ), 1.29-1.46 (m, 6H,  $\text{CH}_2 \times 3$ ), 2.46 (s, 3H,  $\text{CH}_3$ ), 2.85 (t,  $J$  = 7.6 Hz, 2H,  $\text{CH}_2$ ), 3.16 (s, 3H,  $\text{CH}_3$ ), 4.02 (s, 3H,  $\text{CH}_3$ ), 6.94 (d,  $J$  = 9.0 Hz, 1H, ArH), 7.32 (d,  $J$  = 8.0 Hz, 2H, ArH), 7.36 (d,  $J$  = 9.0 Hz, 1H, ArH), 7.68 (d,  $J$  = 8.3 Hz, 1H, ArH), 10.9 (s, 1H, OH) ppm;  $^{13}\text{C NMR}$  (100 MHz,  $\text{CDCl}_3$ ):  $\delta$  = 14.1, 21.6, 22.6, 25.9, 29.3, 32.1, 37.6, 51.9, 105.4, 115.2, 118.5, 118.6, 125.7, 128.1, 129.6, 134.7, 144.2, 146.1, 147.8, 159.2, 170.7 ppm; HRMS (ESI): calcd. for  $\text{C}_{23}\text{H}_{28}\text{NO}_6\text{S}$  ( $[\text{M} + \text{H}]^+$ ) 446.1632, found 446.1634.

**Methyl 5-hydroxy-2-((N,4-dimethylphenyl)sulfonamido)-3-(triisopropylsilyl)benzofuran-4-carboxylate (3d)**

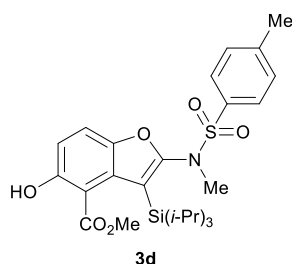

Synthesized by the general procedure; 45.4 mg (85%).

Light yellow solid.  $^1\text{H NMR}$  (400 MHz,  $\text{CDCl}_3$ ):  $\delta$  = 1.20 (br, 18H,  $\text{CH}_3 \times 6$ ), 1.61-1.68 (m, 3H,  $\text{CH} \times 3$ ), 2.48 (s, 3H,  $\text{CH}_3$ ), 3.02 (s, 3H,  $\text{CH}_3$ ), 3.94 (s, 3H,  $\text{CH}_3$ ), 6.93 (d,  $J$  = 9.0 Hz, 1H, ArH), 7.29 (d,  $J$  = 9.0 Hz, 1H, ArH), 7.34 (d,  $J$  = 8.2 Hz, 2H, ArH), 7.71 (d,  $J$  = 8.2 Hz, 2H, ArH), 9.51 (s, 1H, OH) ppm;  $^{13}\text{C NMR}$  (100 MHz,  $\text{CDCl}_3$ ):  $\delta$  = 13.5, 20.0, 38.7, 52.8, 109.3, 110.8, 115.2, 116.9, 127.3, 129.2, 129.4, 130.0, 130.7, 133.6, 144.4, 146.8, 156.3, 170.0 ppm; HRMS (ESI): calcd. for  $\text{C}_{27}\text{H}_{38}\text{NO}_6\text{SSi}$  ( $[\text{M} + \text{H}]^+$ ) 532.2184, found 532.2189.

**Methyl 5-hydroxy-2-(2-oxoazetidin-1-yl)-3-phenylbenzofuran-4-carboxylate (3e)**

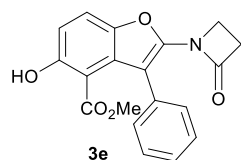

Synthesized by the general procedure; 28.8 mg (85%).

Light yellow solid.  $^1\text{H NMR}$  (400 MHz,  $\text{CDCl}_3$ ):  $\delta$  = 2.99 (s, 3H,  $\text{CH}_3$ ), 3.03 (t,  $J$  = 4.8 Hz, 2H,  $\text{CH}_2$ ), 3.20 (t,  $J$  = 4.7 Hz, 2H,  $\text{CH}_2$ ), 6.91 (d,  $J$  = 9.0 Hz, 1H, ArH), 7.29-7.31 (m, 2H, ArH), 7.36-7.43 (m, 3H, ArH), 7.59 (d,  $J$  = 8.9 Hz, 1H, ArH), 10.9 (s, 1H, OH) ppm;  $^{13}\text{C NMR}$

NMR (100 MHz, CDCl<sub>3</sub>):  $\delta$  = 38.0, 41.0, 50.8, 104.4, 108.0, 113.8, 118.2, 126.8, 127.3, 127.7, 130.2, 133.6, 145.1, 145.9, 159.5, 164.1, 170.3 ppm; HRMS (ESI): calcd. for C<sub>19</sub>H<sub>16</sub>NO<sub>5</sub> ([M + H]<sup>+</sup>) 338.1023, found 338.1022.

### Methyl 5-hydroxy-2-(2-oxoazetidin-1-yl)-3-pentylbenzofuran-4-carboxylate (3f)

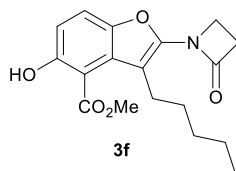

Synthesized by the general procedure; 30.1 mg (91%).

Light yellow solid. <sup>1</sup>H NMR (400 MHz, CDCl<sub>3</sub>):  $\delta$  = 0.87 (t, *J* = 6.9 Hz, 3H, CH<sub>3</sub>), 1.25-1.45 (m, 6H, CH<sub>2</sub>×3), 2.80 (t, *J* = 7.6 Hz, 2H, CH<sub>2</sub>), 3.21 (t, *J* = 4.7 Hz, 2H, CH<sub>2</sub>), 3.81 (t, *J* = 4.6 Hz, 2H, CH<sub>2</sub>), 3.99 (s, 3H, CH<sub>3</sub>), 6.89 (d, *J* = 9.0 Hz, 1H, ArH), 7.45 (d, *J* = 9.0 Hz, 1H, ArH), 10.9 (s, 1H, OH) ppm; <sup>13</sup>C NMR (100 MHz, CDCl<sub>3</sub>):  $\delta$  = 14.1, 22.6, 25.1, 29.7, 31.9, 37.3, 40.9, 51.8, 105.1, 110.8, 114.1, 118.2, 126.6, 144.6, 145.6, 159.2, 164.5, 170.8 ppm; HRMS (ESI): calcd. for C<sub>18</sub>H<sub>22</sub>NO<sub>5</sub> ([M + H]<sup>+</sup>) 332.1492, found 332.1494.

### Methyl 1-(5-hydroxy-4-(methoxycarbonyl)-3-phenylbenzofuran-2-yl)-1H-indole-3-carboxylate (3g)

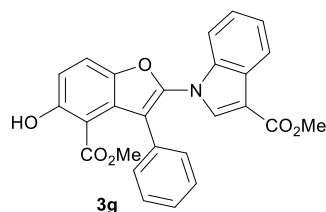

Synthesized by the general procedure; 39.6 mg (90%).

Light yellow solid. <sup>1</sup>H NMR (400 MHz, CDCl<sub>3</sub>):  $\delta$  = 3.05 (s, 3H, CH<sub>3</sub>), 3.86 (s, 3H, CH<sub>3</sub>), 7.09 (d, *J* = 9.0 Hz, 1H, ArH), 7.16-7.19 (m, 2H, ArH), 7.28-7.34 (m, 5H, ArH), 7.42-7.44 (m, 1H, ArH), 7.60 (s, 1H, ArH), 7.67 (d, *J* = 9.0 Hz, 1H, ArH), 8.14-8.16 (m, 1H, ArH), 10.8 (s, 1H, OH) ppm; <sup>13</sup>C NMR (100 MHz, CDCl<sub>3</sub>):  $\delta$  = 51.12, 51.26, 105.1, 110.9, 111.7, 115.7, 118.6, 121.7, 123.2, 124.2, 126.0, 126.1, 127.5, 128.4, 128.9, 132.8, 133.9, 137.5, 145.8, 146.0, 159.5, 164.7, 170.0 ppm; HRMS (ESI): calcd. for C<sub>26</sub>H<sub>20</sub>NO<sub>6</sub> ([M + H]<sup>+</sup>) 442.1285, found 442.1284.

### Methyl 1-(5-hydroxy-4-(methoxycarbonyl)-3-pentylbenzofuran-2-yl)-1H-indole-3-carboxylate (3h)

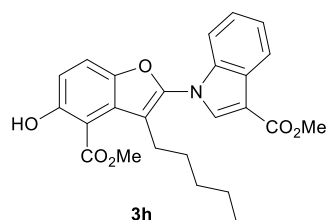

Synthesized by the general procedure; 41.2 mg (90%); for a large scale reaction 1.64 g (92%). Light yellow solid.  $^1\text{H}$  NMR (400 MHz,  $\text{CDCl}_3$ ):  $\delta$  = 0.72 (t,  $J$  = 6.7 Hz, 3H,  $\text{CH}_3$ ), 1.05-1.12 (m, 3H,  $\text{CH}_2 \times 1.5$ ), 1.35-1.45 (m, 3H,  $\text{CH}_2 \times 1.5$ ), 2.64 (t,  $J$  = 7.6 Hz, 2H,  $\text{CH}_2$ ), 3.96 (s, 3H,  $\text{CH}_3$ ), 4.04 (s, 3H,  $\text{CH}_3$ ), 7.05 (d,  $J$  = 9.0 Hz, 1H, ArH), 7.28-7.39 (m, 3H, ArH), 7.59 (d,  $J$  = 9.0 Hz, 1H, ArH), 7.96 (s, 1H, ArH), 8.24-8.27 (m, 1H, ArH), 11.0 (s, 1H, OH) ppm;  $^{13}\text{C}$  NMR(100 MHz,  $\text{CDCl}_3$ ):  $\delta$  = 13.8, 22.3, 25.5, 29.5, 31.5, 51.4, 52.0, 105.4, 111.0, 111.3, 115.0, 115.7, 119.0, 121.9, 123.2, 124.3, 125.7, 126.1, 134.3, 137.8, 145.1, 146.5, 159.6, 164.9, 170.5 ppm; HRMS (ESI): calcd. for  $\text{C}_{25}\text{H}_{26}\text{NO}_6$  ( $[\text{M} + \text{H}]^+$ ) 436.1755, found 436.1777.

## 5. References

- [1] T. Hamada, X. Ye and S. S. Stahl, *J. Am. Chem. Soc.*, 2008, **130**, 833.
- [2] W. D. Mackay, M. Fistikci, R. M. Carris and J. S. Johnson, *Org. Lett.*, 2014, **16**, 1626.
- [3] Y. H. Chen, D. J. Cheng, J. Zhang, Y. Wang, X. Y. Liu and B. Tan, *J. Am. Chem. Soc.*, 2015, **137**, 15062.

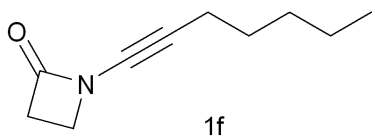

— 7.260

3.560  
3.549  
3.537  
2.986  
2.975  
2.963  
2.271  
2.253  
2.235  
1.522  
1.505  
1.487  
1.469  
1.451  
1.363  
1.347  
1.340  
1.320  
1.310  
1.302  
1.295  
1.279

```

NAME      ynamide-1f
EXPNO     20190228
PROCNO    1
Date_     20190228
Time      19.58
INSTRUM   spect
PROBHD    5 mm PABBO BB-
PULPROG   zg30
TD         65536
SOLVENT   CDCl3
NS         16
DS         2
SWH       8223.685 Hz
FIDRES    0.125483 Hz
AQ         3.9846387 sec
RG         80.6
DW         60.800 usec
DE         6.50 usec
TE         293.9 K
D1         1.00000000 sec
TDO        1
  
```

```

===== CHANNEL f1 =====
NUC1      1H
P1         14.80 usec
PL1        -1.00 dB
PL1W      10.90985775 W
SFO1      400.1724712 MHz
SI         32768
SF         400.1700156 MHz
WDW        no
SSB        0
LB         0.00 Hz
GB         0
PC         1.00
  
```

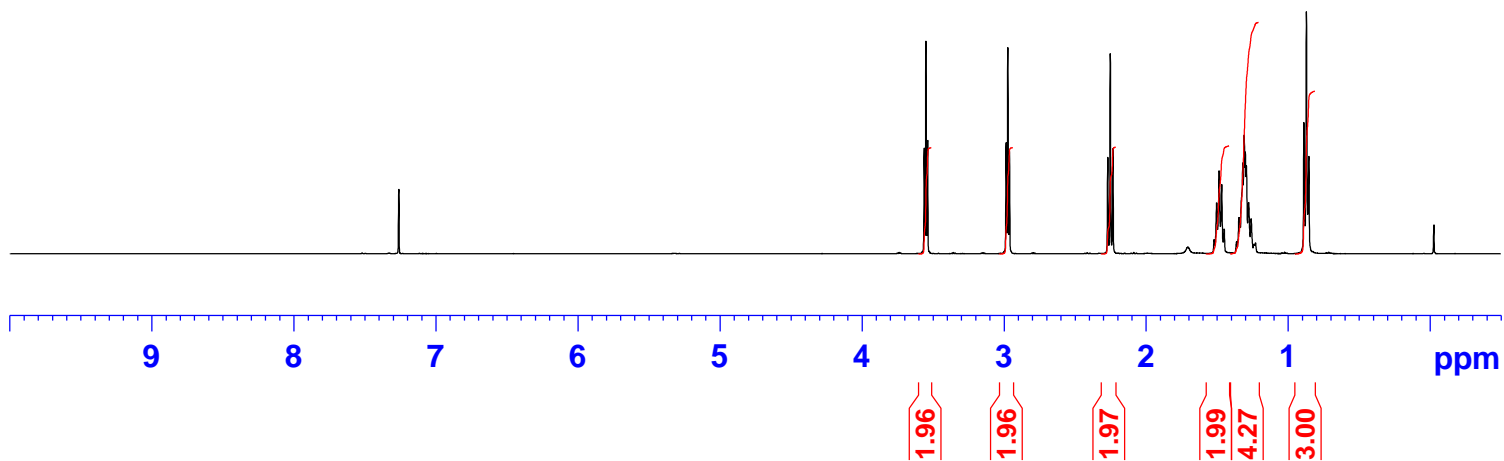



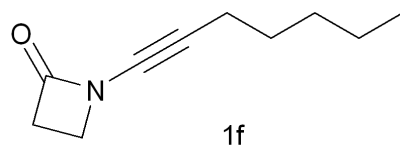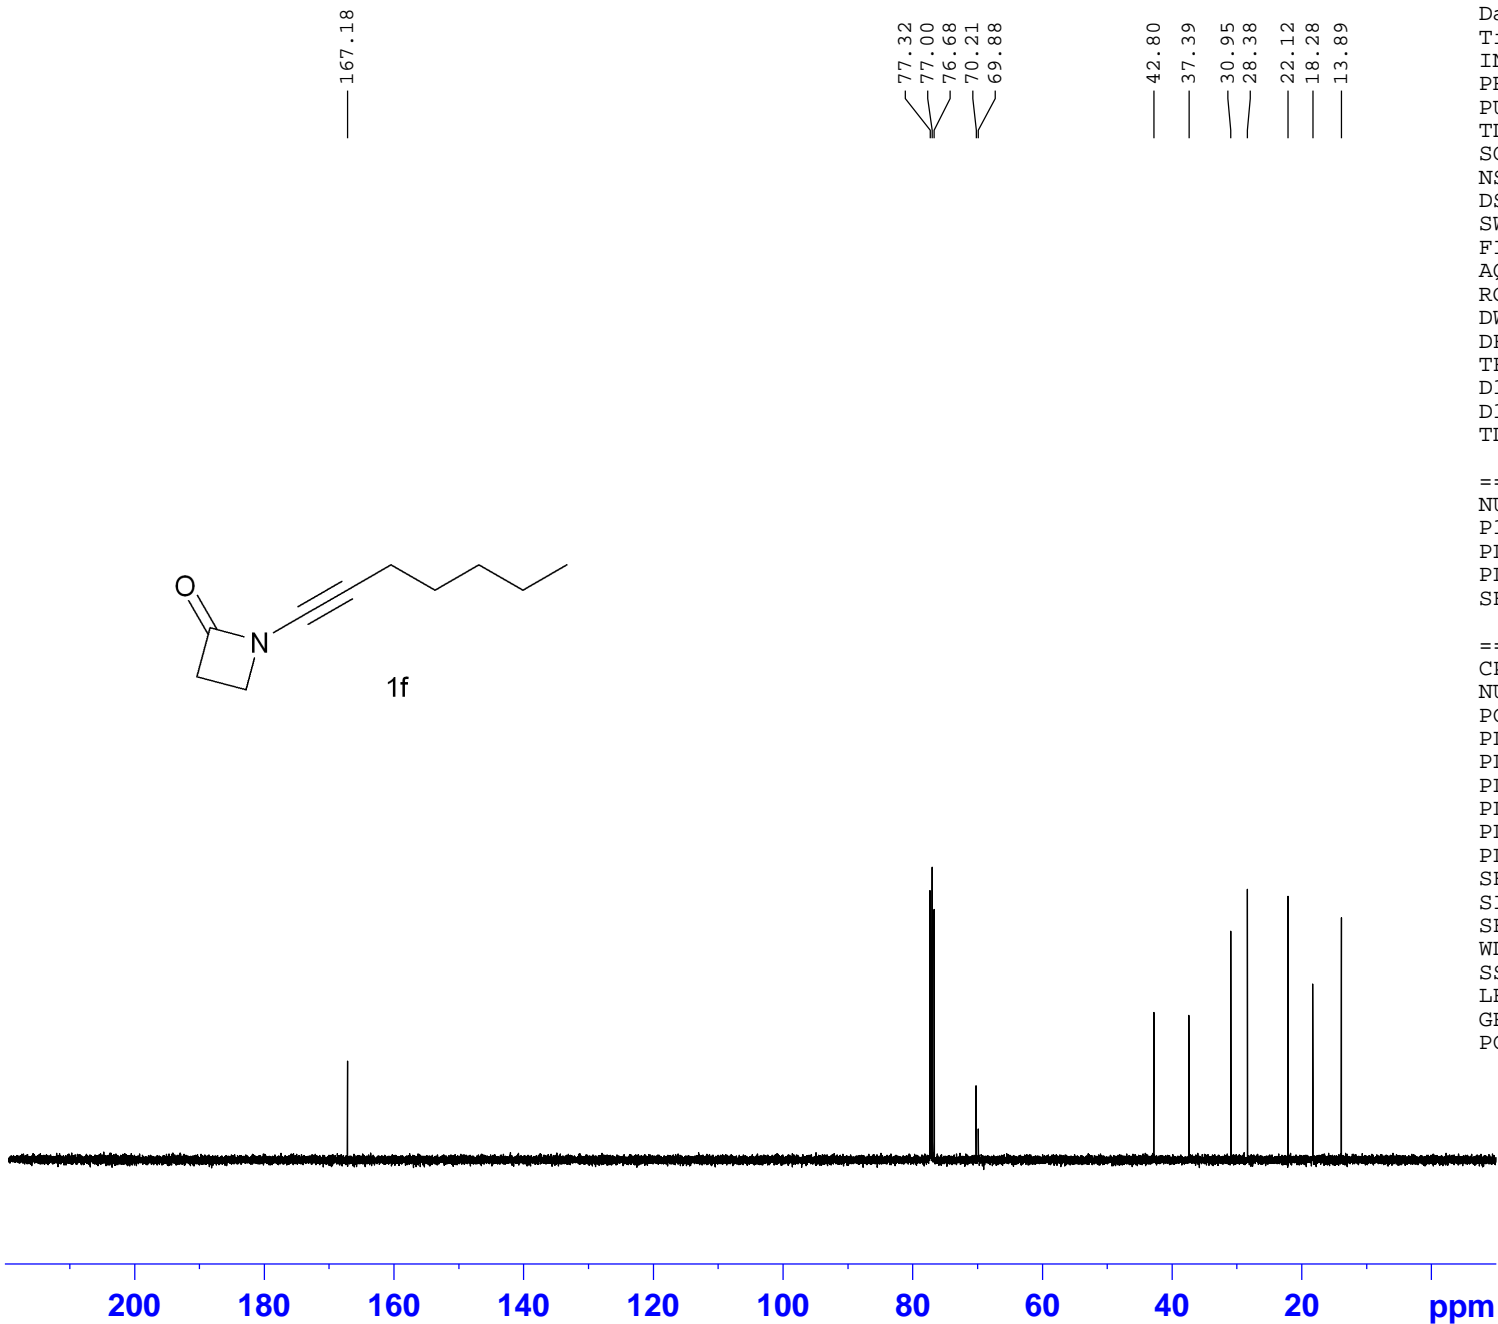

```

NAME          ynamide-1f
EXPNO         2019022803
PROCNO        1
Date_         20190228
Time          20.03
INSTRUM       spect
PROBHD        5 mm PABBO BB-
PULPROG       zgpg30
TD            65536
SOLVENT       CDC13
NS            155
DS            4
SWH           24038.461 Hz
FIDRES        0.366798 Hz
AQ            1.3631988 sec
RG            2050
DW            20.800 usec
DE            6.50 usec
TE            294.3 K
D1            2.0000000 sec
D11           0.0300000 sec
TD0           1
  
```

```

===== CHANNEL f1 =====
NUC1          13C
P1            9.90 usec
PL1           -1.10 dB
PL1W          40.29647064 W
SFO1          100.6328888 MHz
  
```

```

===== CHANNEL f2 =====
CPDPRG2       waltz16
NUC2          1H
PCPD2         90.00 usec
PL2           -1.00 dB
PL12          14.68 dB
PL13          17.68 dB
PL2W          10.90985775 W
PL12W         0.29499799 W
PL13W         0.14784923 W
SFO2          400.1716007 MHz
SI            32768
SF            100.6228355 MHz
WDW           no
SSB           0
LB            0.00 Hz
GB            0
PC            1.40
  
```

8.167  
8.148  
7.886  
7.558  
7.538  
7.390  
7.373  
7.350  
7.331  
7.313  
7.260

3.921  
2.491  
2.474  
2.456  
1.677  
1.659  
1.640  
1.622  
1.514  
1.498  
1.490  
1.479  
1.475  
1.464  
1.458  
1.441  
1.417  
1.399  
1.381  
1.363

```

NAME      ynamide-1h
EXPNO     2019022801
PROCNO    1
Date_     20190228
Time      20.16
INSTRUM   spect
PROBHD    5 mm PABBO BB-
PULPROG   zg30
TD         65536
SOLVENT   CDC13
NS         16
DS         2
SWH       8223.685 Hz
FIDRES    0.125483 Hz
AQ         3.9846387 sec
RG         90.5
DW         60.800 usec
DE         6.50 usec
TE         294.3 K
D1         1.00000000 sec
TD0        1
  
```

```

===== CHANNEL f1 =====
NUC1      1H
P1        14.80 usec
PL1       -1.00 dB
PL1W      10.90985775 W
SFO1      400.1724712 MHz
SI         32768
SF        400.1700153 MHz
WDW        no
SSB        0
LB         0.00 Hz
GB         0
PC         1.00
  
```

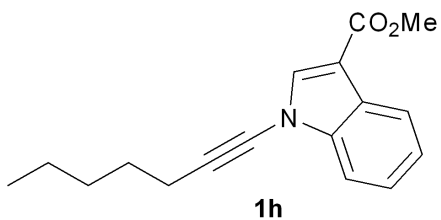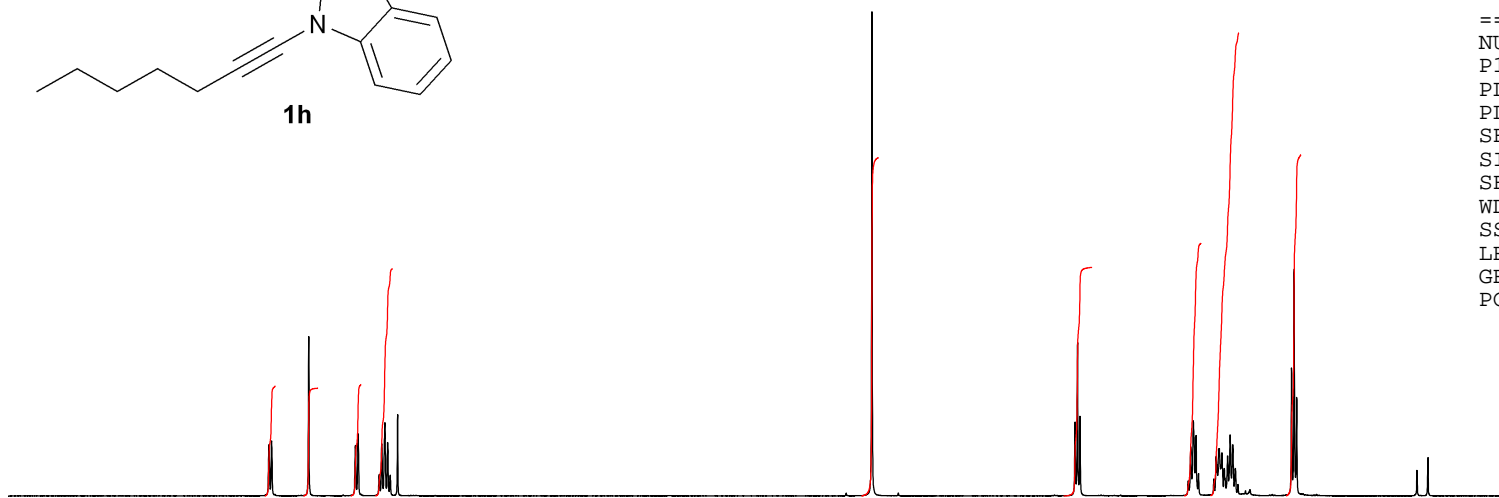

1.00  
0.98  
1.02  
2.07  
3.08  
2.08  
2.30  
4.21  
3.10

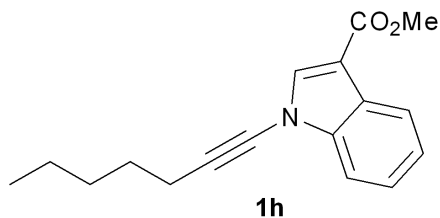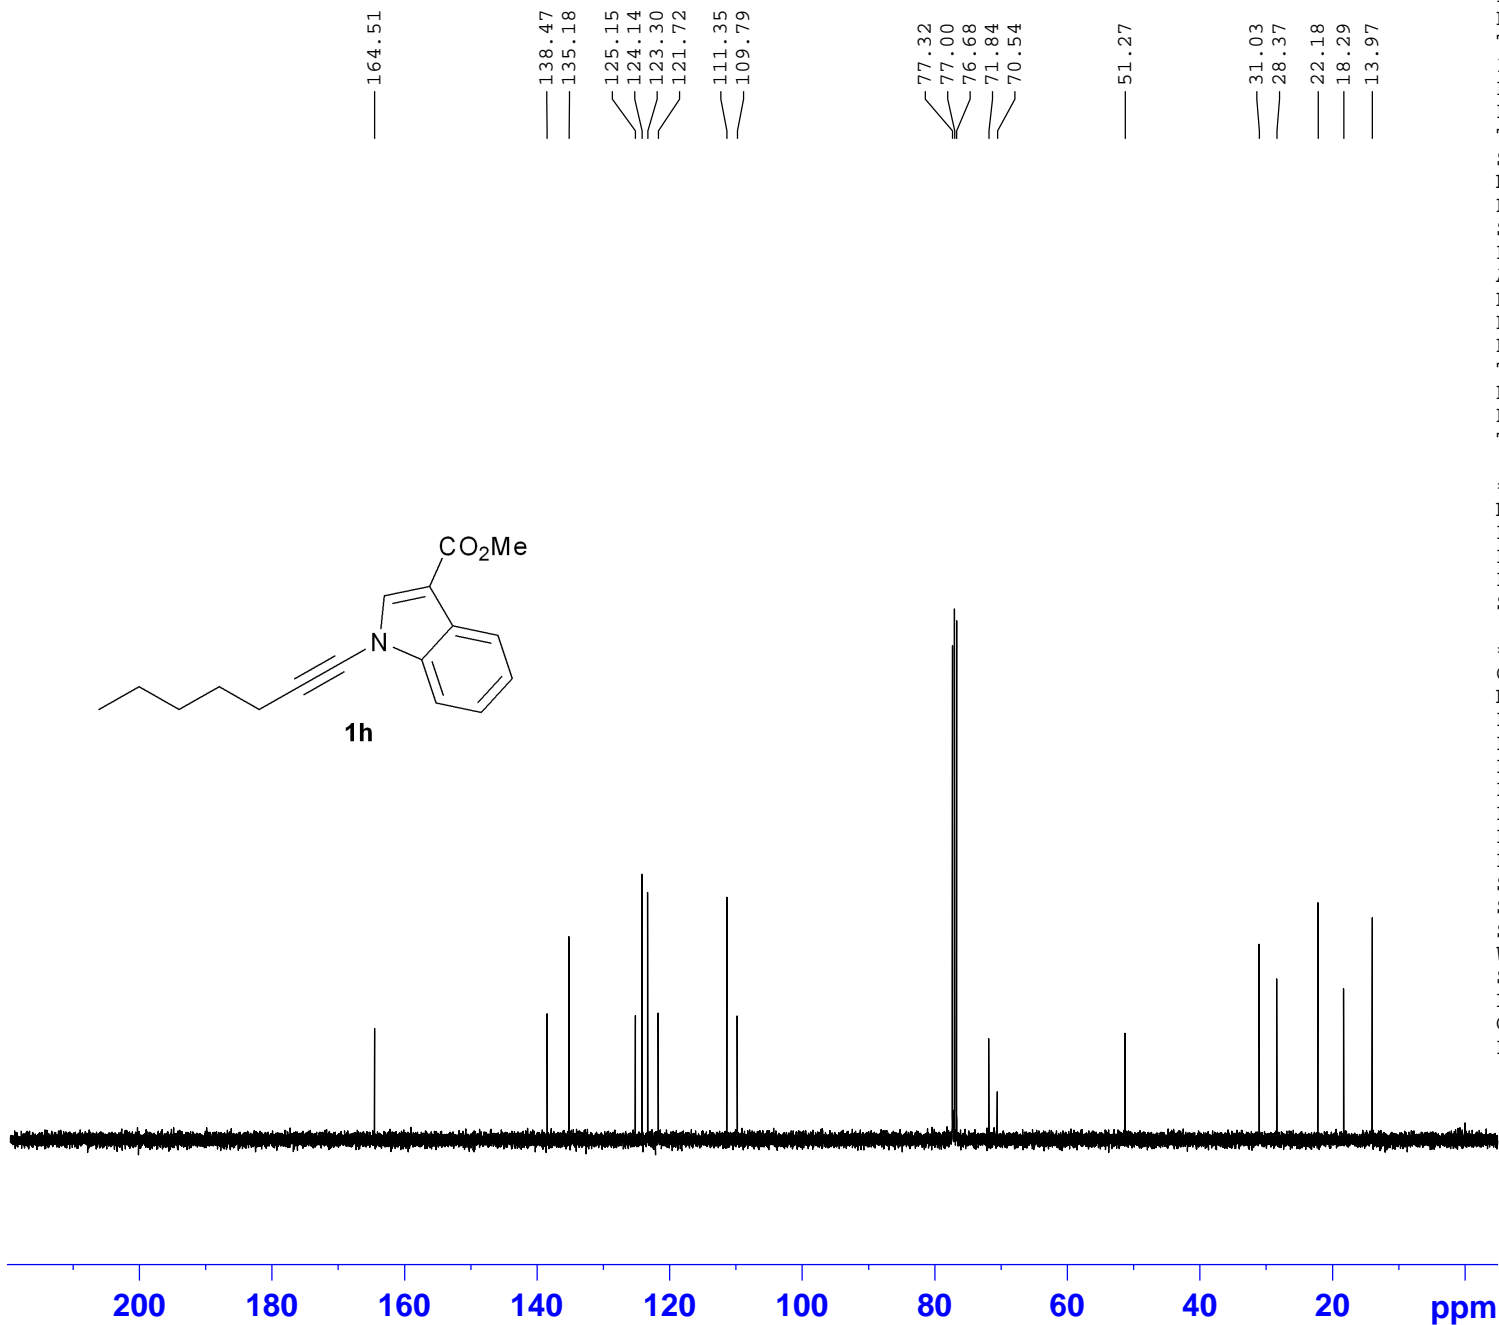

```

NAME          ynamide-1h
EXPNO         2019022802
PROCNO        1
Date_         20190228
Time          20.19
INSTRUM       spect
PROBHD        5 mm PABBO BB-
PULPROG       zgpg30
TD            65536
SOLVENT       CDCl3
NS            179
DS            4
SWH           24038.461 Hz
FIDRES        0.366798 Hz
AQ            1.3631988 sec
RG            2050
DW            20.800 usec
DE            6.50 usec
TE            294.4 K
D1            2.0000000 sec
D11           0.03000000 sec
TD0           1
  
```

```

===== CHANNEL f1 =====
NUC1          13C
P1            9.90 usec
PL1           -1.10 dB
PL1W          40.29647064 W
SFO1          100.6328888 MHz
  
```

```

===== CHANNEL f2 =====
CPDPRG2       waltz16
NUC2          1H
PCPD2         90.00 usec
PL2           -1.00 dB
PL12          14.68 dB
PL13          17.68 dB
PL2W          10.90985775 W
PL12W         0.29499799 W
PL13W         0.14784923 W
SFO2          400.1716007 MHz
SI            32768
SF            100.6228341 MHz
WDW           no
SSB           0
LB            0.00 Hz
GB            0
PC            1.40
  
```

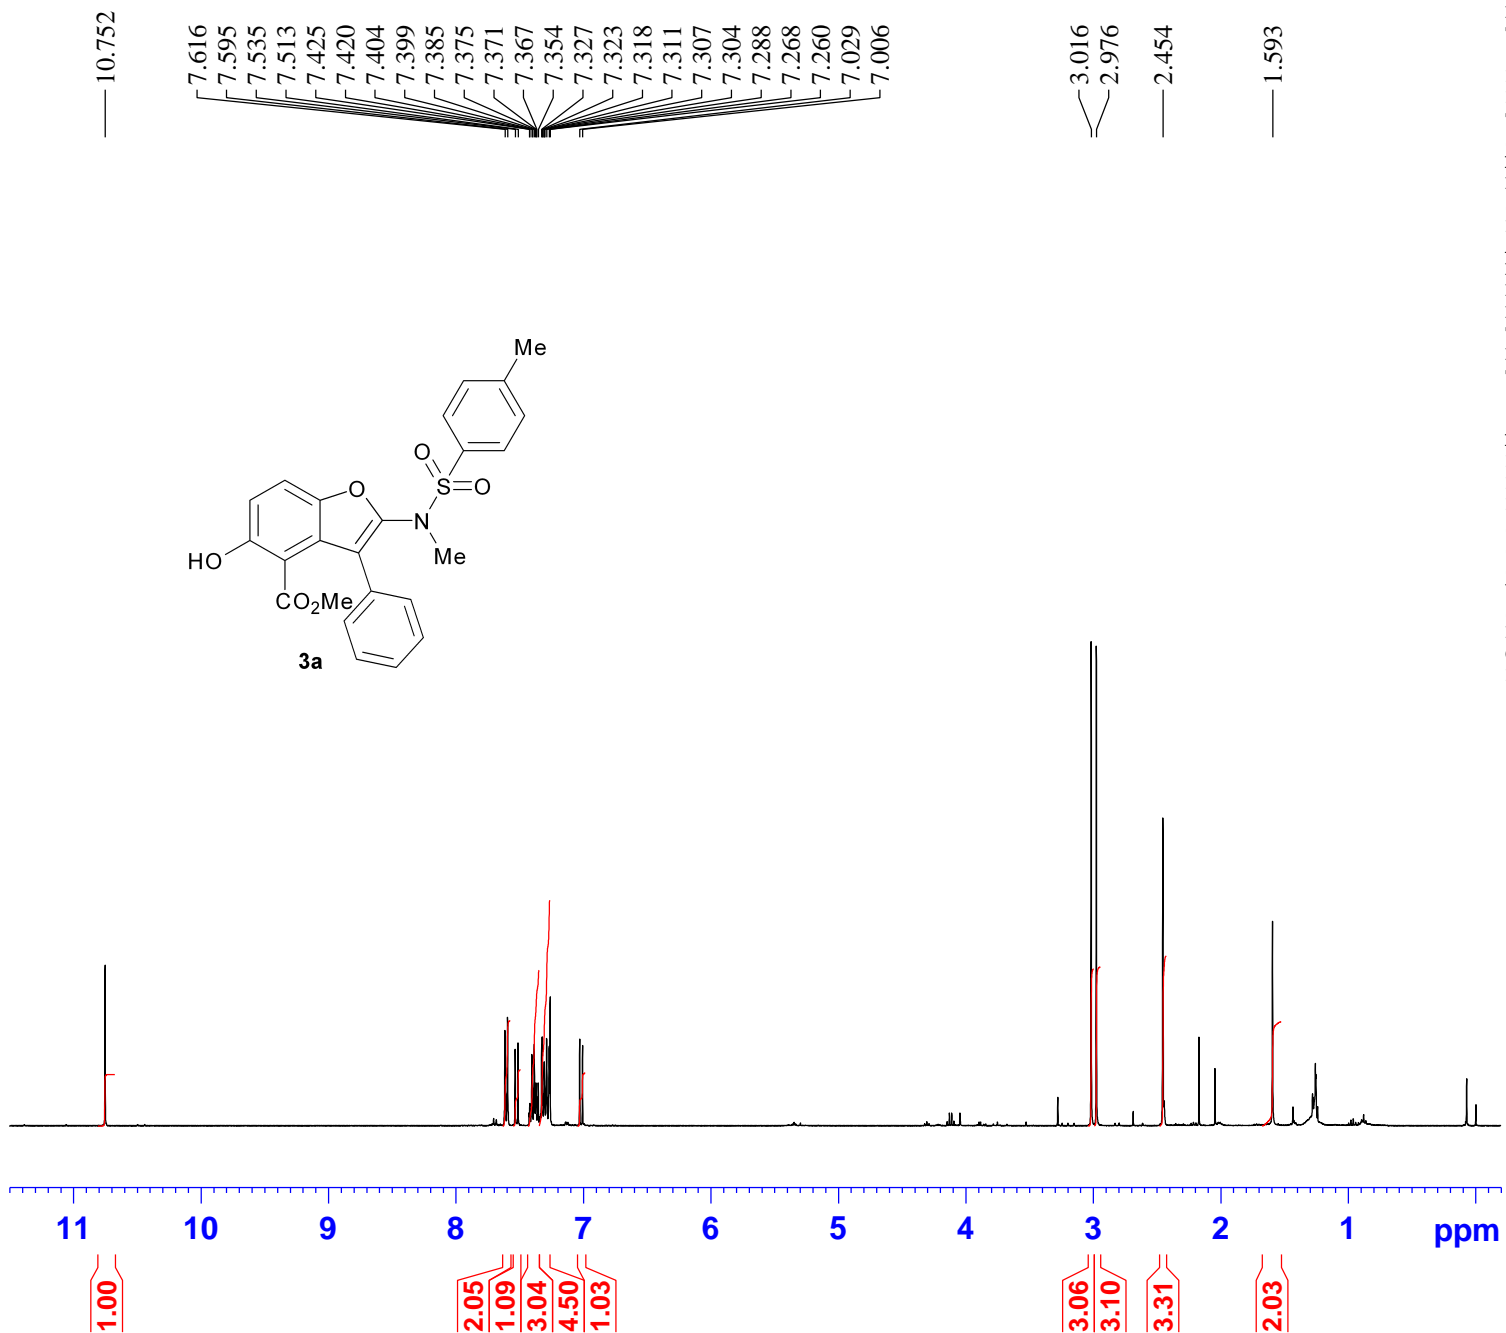

```

NAME          fanyin 5
EXPNO         20181127
PROCNO        1
Date_         20181127
Time          15.35
INSTRUM       spect
PROBHD        5 mm PABBO BB-
PULPROG       zg30
TD            65536
SOLVENT       CDCl3
NS            16
DS            2
SWH           8223.685 Hz
FIDRES        0.125483 Hz
AQ            3.9846387 sec
RG            228
DW            60.800 usec
DE            6.50 usec
TE            296.0 K
D1            1.00000000 sec
TD0           1

```

```

===== CHANNEL f1 =====
NUC1           1H
P1             14.80 usec
PL1            -1.00 dB
PL1W          10.90985775 W
SF01          400.1724712 MHz
SI            32768
SF            400.1700153 MHz
WDW            no
SSB            0
LB            0.00 Hz
GB            0
PC            1.00

```

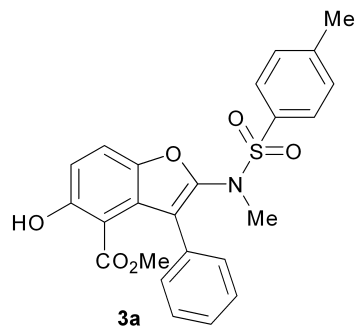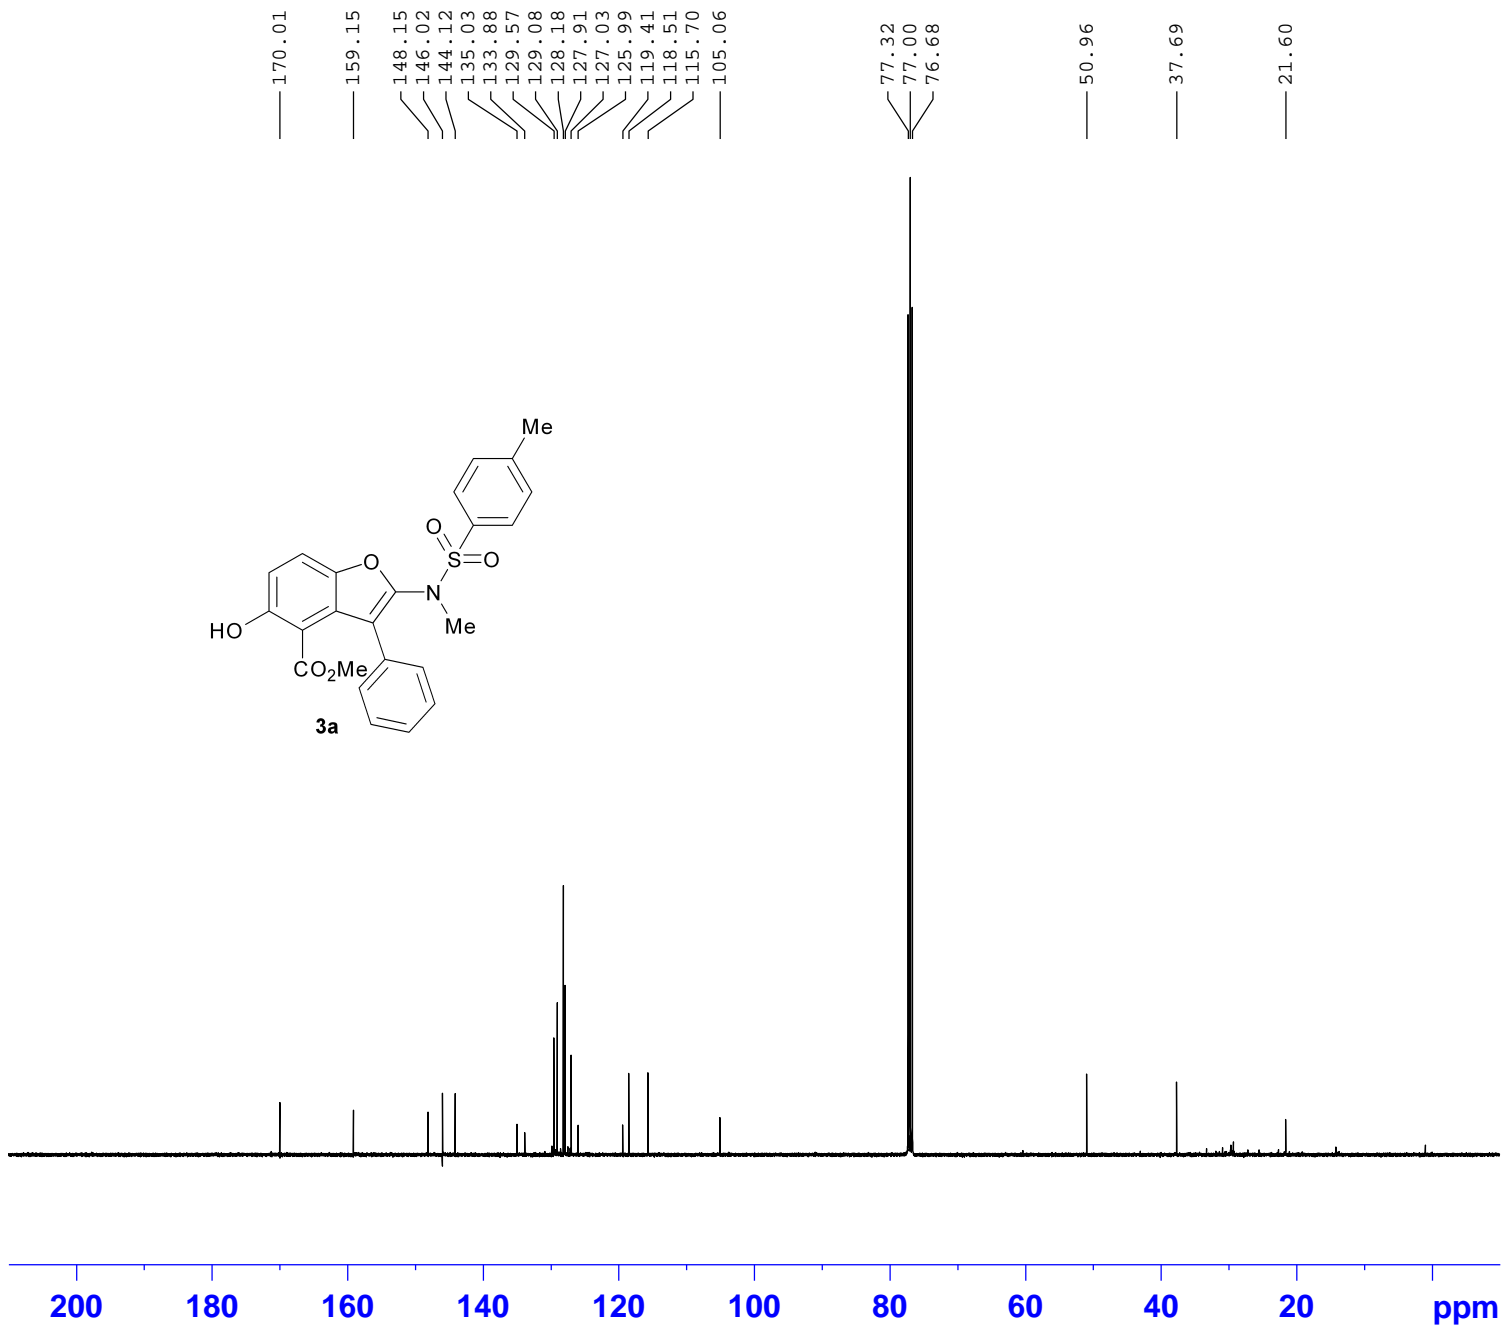

```

NAME          fanyin 5
EXPNO         2018112701
PROCNO        1
Date_         20181127
Time          15.47
INSTRUM       spect
PROBHD        5 mm PABBO BB-
PULPROG       zgpg30
TD            65536
SOLVENT       CDCl3
NS            10000
DS            4
SWH           24038.461 Hz
FIDRES        0.366798 Hz
AQ            1.3631988 sec
RG            2050
DW            20.800 usec
DE            6.50 usec
TE            296.4 K
D1            2.00000000 sec
D11           0.03000000 sec
TD0           1

```

```

===== CHANNEL f1 =====
NUC1          13C
P1            9.90 usec
PL1           -1.10 dB
PL1W          40.29647064 W
SFO1          100.6328888 MHz

```

```

===== CHANNEL f2 =====
CPDPRG2       waltz16
NUC2          1H
PCPD2         90.00 usec
PL2           -1.00 dB
PL12          14.68 dB
PL13          17.68 dB
PL2W          10.90985775 W
PL12W         0.29499799 W
PL13W         0.14784923 W
SFO2          400.1716007 MHz
SI            32768
SF            100.6228319 MHz
WDW           no
SSB           0
LB            0.00 Hz
GB            0
PC            1.40

```

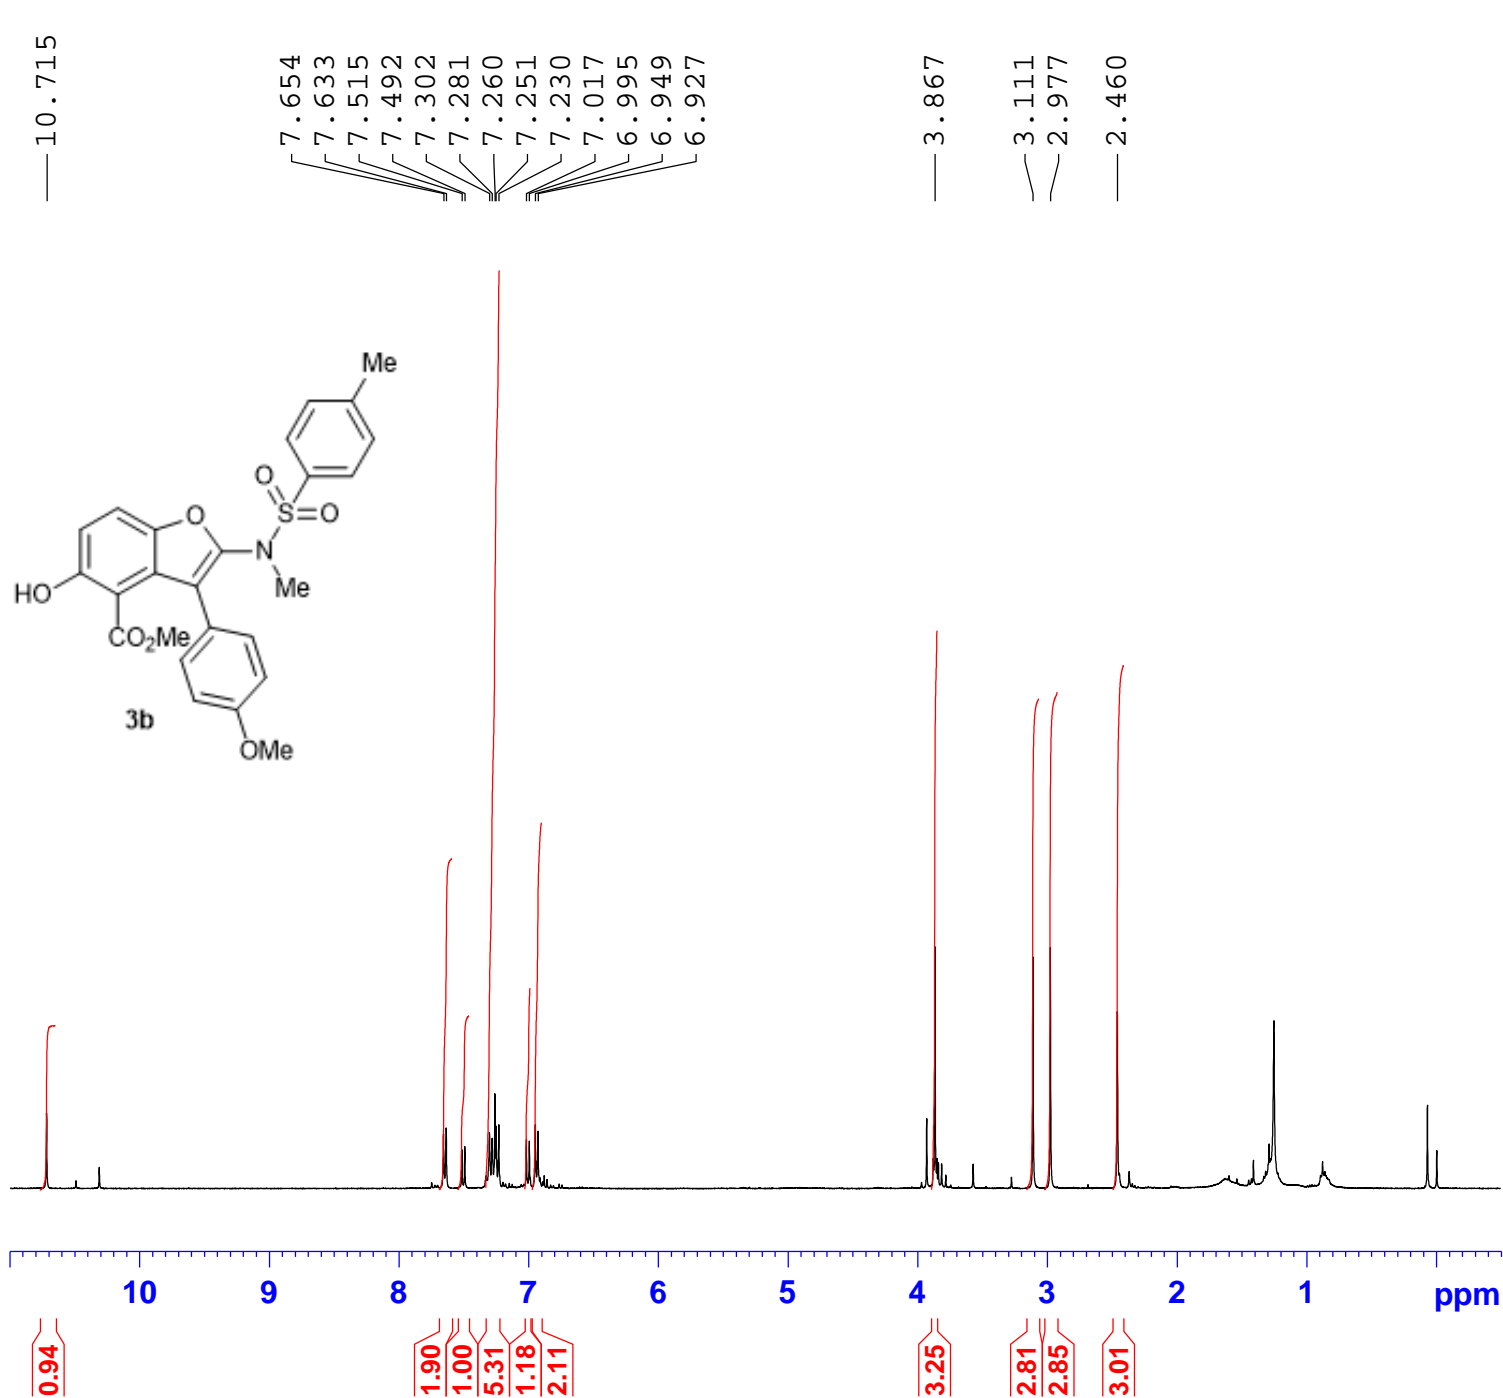

```

NAME          dz01
EXPNO         20181130
PROCNO        1
Date_         20181130
Time          17.07
INSTRUM       spect
PROBHD        5 mm PABBO BB-
PULPROG       zg30
TD            65536
SOLVENT       CDCl3
NS            16
DS            2
SWH           8223.685 Hz
FIDRES        0.125483 Hz
AQ            3.9846387 sec
RG            203
DW            60.800 usec
DE            6.50 usec
TE            295.6 K
D1            1.00000000 sec
TD0           1

```

```

===== CHANNEL f1 =====
NUC1          1H
P1            14.80 usec
PL1           -1.00 dB
PL1W         10.90985775 W
SFO1         400.1724712 MHz
SI            32768
SF           400.1700158 MHz
WDW           no
SSB           0
LB            0.00 Hz
GB            0
PC            1.00

```

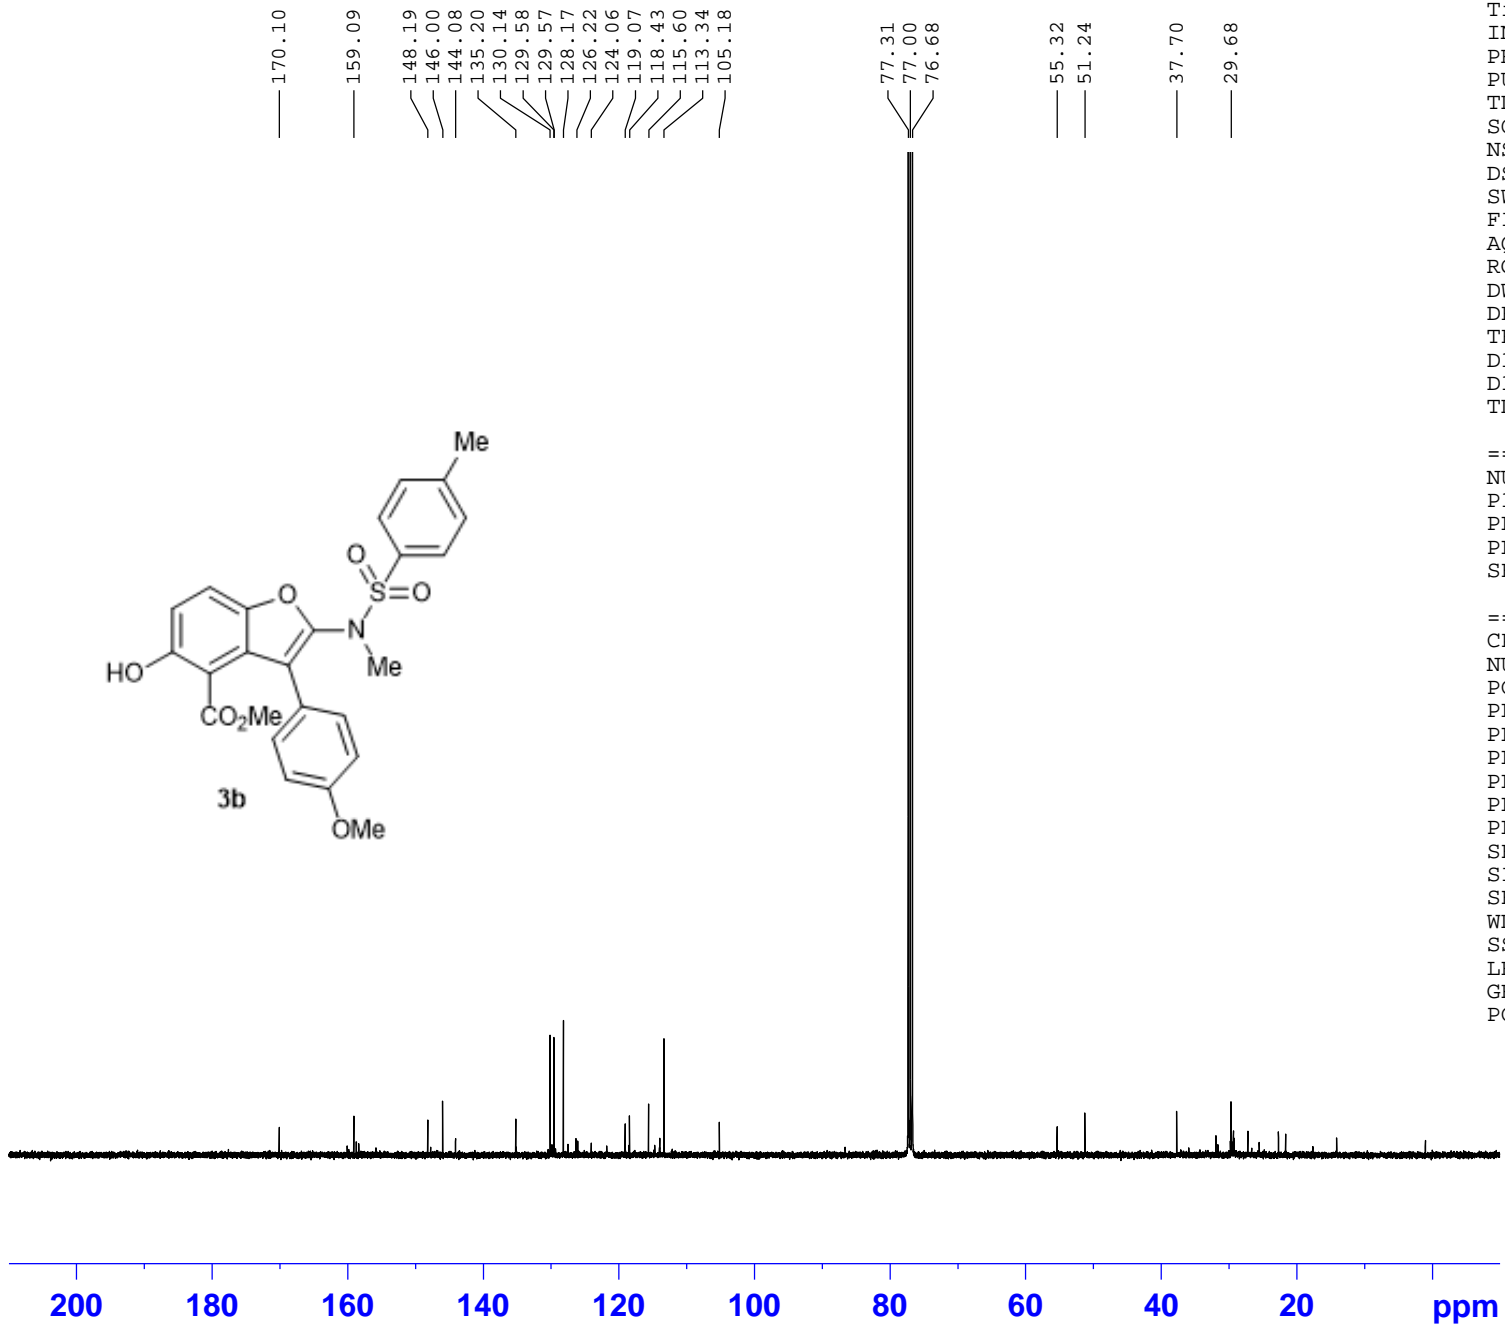

```

NAME          dz01
EXPNO         2018113004
PROCNO        1
Date_         20181130
Time          22.38
INSTRUM       spect
PROBHD        5 mm PABBO BB-
PULPROG       zgpg30
TD            65536
SOLVENT       CDCl3
NS            12000
DS            4
SWH           24038.461 Hz
FIDRES        0.366798 Hz
AQ            1.3631988 sec
RG            2050
DW            20.800 usec
DE            6.50 usec
TE            295.9 K
D1            2.00000000 sec
D11           0.03000000 sec
TD0           1

```

```

===== CHANNEL f1 =====
NUC1          13C
P1            9.90 usec
PL1           -1.10 dB
PL1W          40.29647064 W
SFO1          100.6328888 MHz

```

```

===== CHANNEL f2 =====
CPDPRG2       waltz16
NUC2          1H
PCPD2         90.00 usec
PL2           -1.00 dB
PL12          14.68 dB
PL13          17.68 dB
PL2W          10.90985775 W
PL12W         0.29499799 W
PL13W         0.14784923 W
SFO2          400.1716007 MHz
SI            32768
SF            100.6228303 MHz
WDW           no
SSB           0
LB            0.00 Hz
GB            0
PC            1.40

```

— 10.896

7.692  
7.671  
7.370  
7.348  
7.333  
7.313  
7.260  
6.946  
6.924

4.016  
3.156  
2.869  
2.850  
2.830  
2.463  
1.460  
1.445  
1.426  
1.313  
1.304  
1.297  
1.295  
1.290  
0.898  
0.881  
0.864

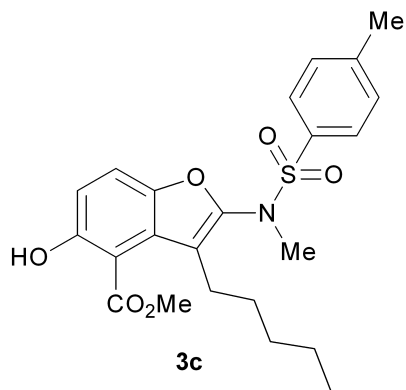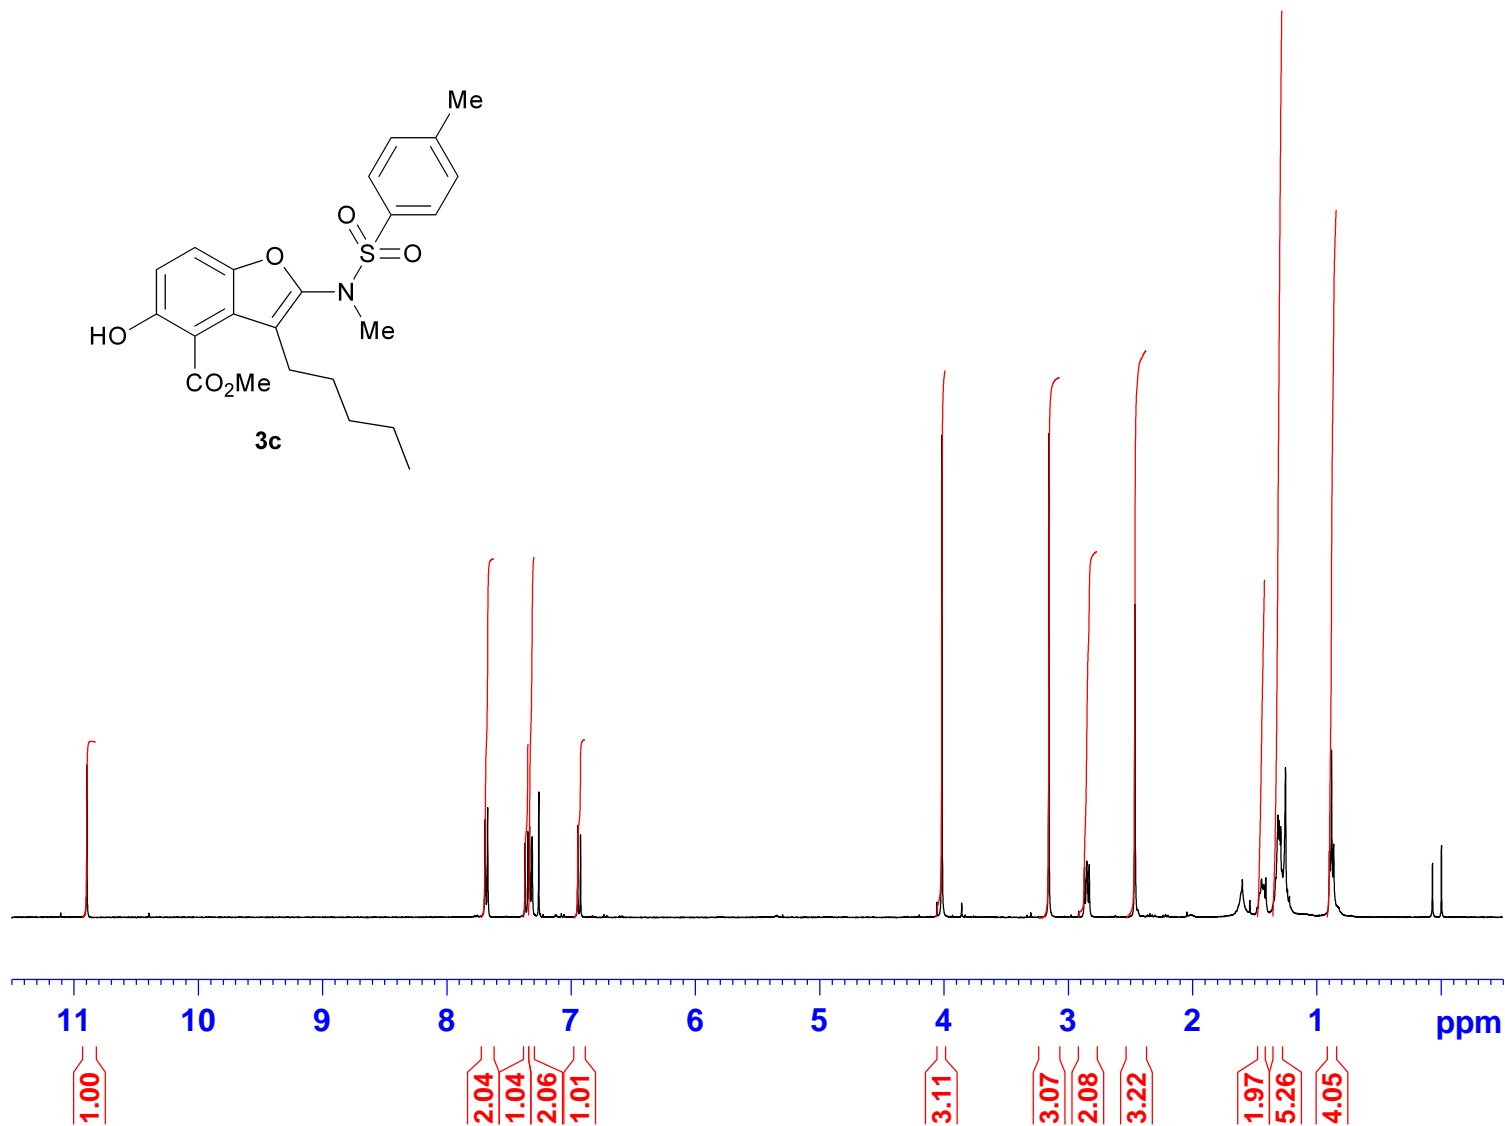

NAME dz02  
EXPNO 2018113001  
PROCNO 1  
Date\_ 20181130  
Time\_ 21.20  
INSTRUM spect  
PROBHD 5 mm PABBO BB-  
PULPROG zg30  
TD 65536  
SOLVENT CDCl3  
NS 16  
DS 2  
SWH 8223.685 Hz  
FIDRES 0.125483 Hz  
AQ 3.9846387 sec  
RG 144  
DW 60.800 usec  
DE 6.50 usec  
TE 295.2 K  
D1 1.00000000 sec  
TD0 1

==== CHANNEL f1 =====  
NUC1 1H  
P1 14.80 usec  
PL1 -1.00 dB  
PL1W 10.90985775 W  
SFO1 400.1724712 MHz  
SI 32768  
SF 400.1700153 MHz  
WDW no  
SSB 0  
LB 0.00 Hz  
GB 0  
PC 1.00



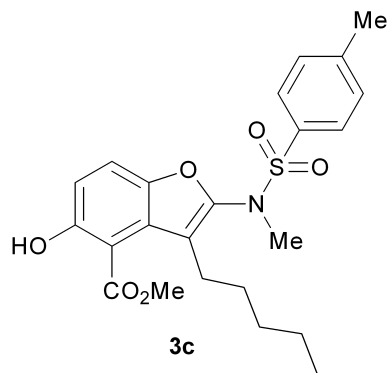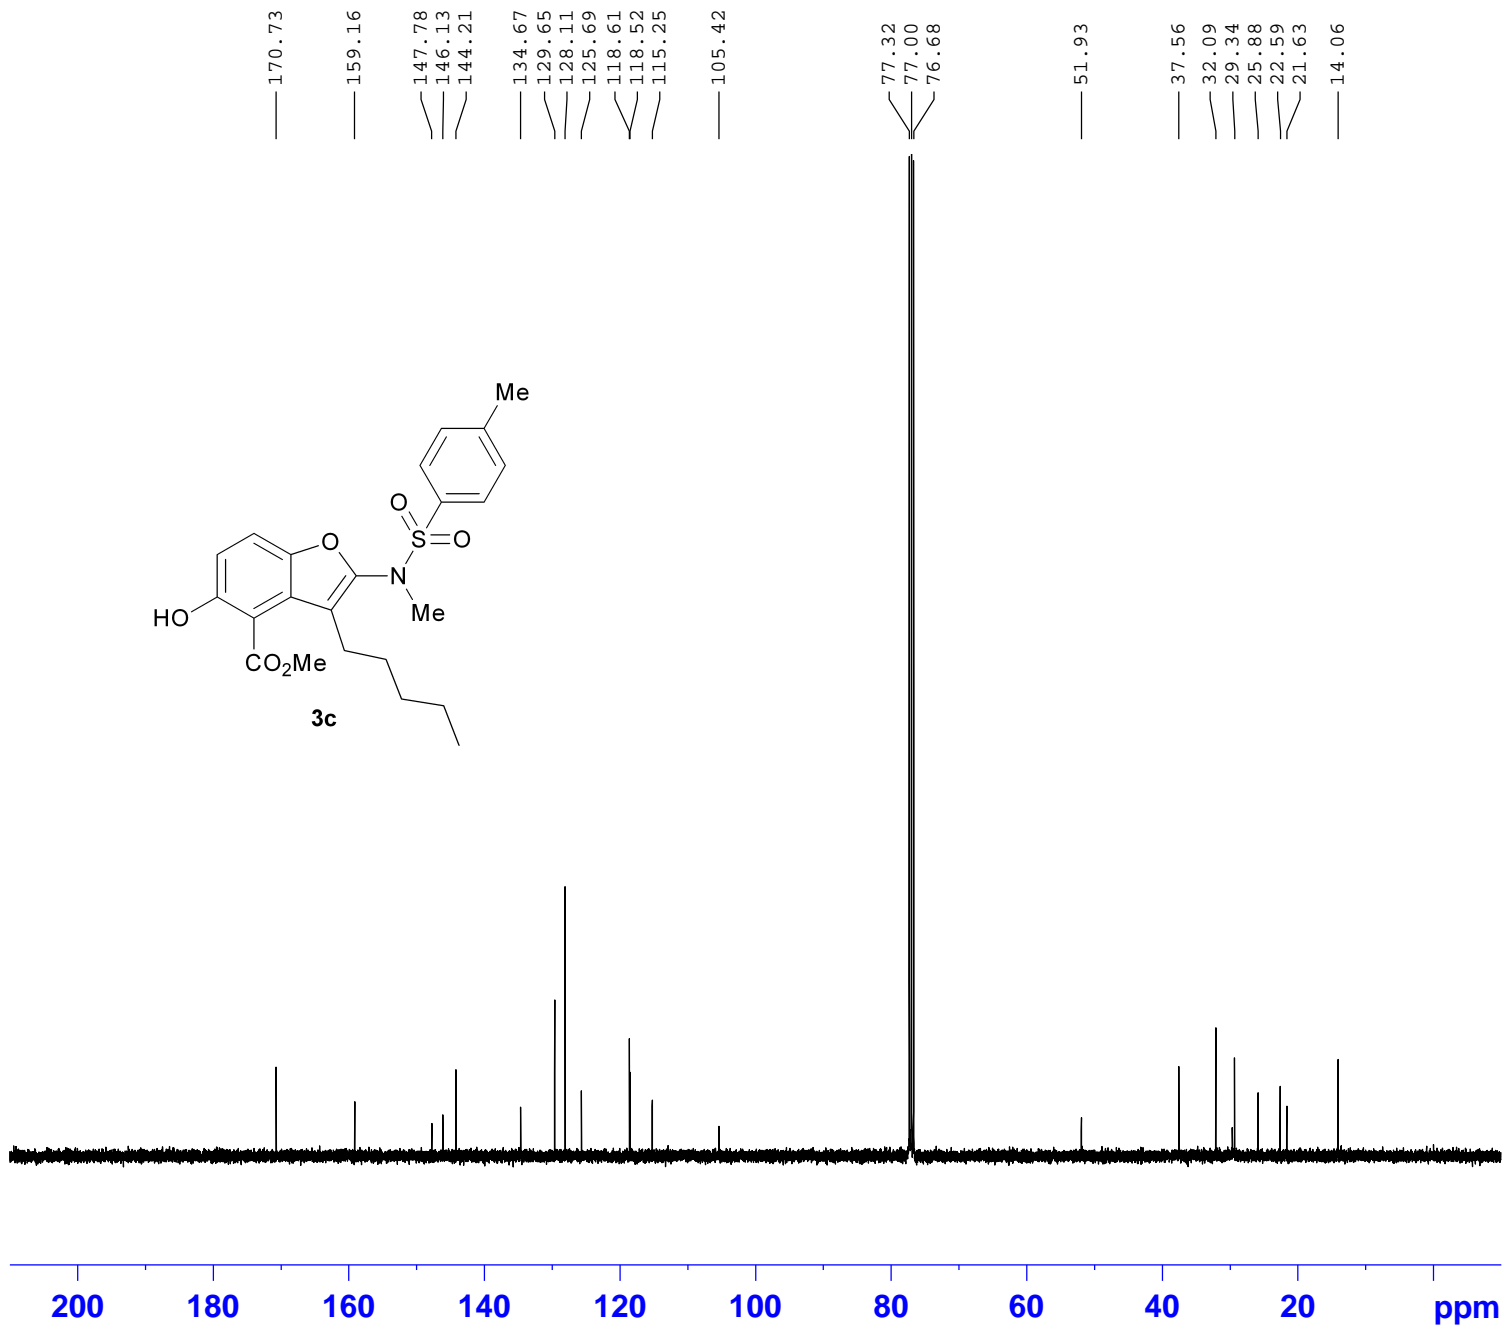

```

NAME          dz02
EXPNO         2018113002
PROCNO        1
Date_         20181130
Time          21.25
INSTRUM       spect
PROBHD        5 mm PABBO BB-
PULPROG       zgpg30
TD            65536
SOLVENT       CDC13
NS            1093
DS            4
SWH           24038.461 Hz
FIDRES        0.366798 Hz
AQ            1.3631988 sec
RG            2050
DW            20.800 usec
DE            6.50 usec
TE            295.5 K
D1            2.00000000 sec
D11           0.03000000 sec
TD0           1

```

```

===== CHANNEL f1 =====
NUC1          13C
P1            9.90 usec
PL1           -1.10 dB
PL1W          40.29647064 W
SFO1          100.6328888 MHz

```

```

===== CHANNEL f2 =====
CPDPRG2       waltz16
NUC2          1H
PCPD2         90.00 usec
PL2           -1.00 dB
PL12          14.68 dB
PL13          17.68 dB
PL2W          10.90985775 W
PL12W         0.29499799 W
PL13W         0.14784923 W
SFO2          400.1716007 MHz
SI            32768
SF            100.6228319 MHz
WDW           no
SSB           0
LB            0.00 Hz
GB            0
PC            1.40

```

— 9.512

7.720  
7.699  
7.352  
7.332  
7.304  
7.282  
7.260  
6.945  
6.923

— 3.937

— 3.124

— 2.481

1.684  
1.665  
1.646  
1.627  
1.608  
1.202

```
NAME          dz20
EXPNO         2018121801
PROCNO        1
Date_         20181219
Time          14.58
INSTRUM       spect
PROBHD        5 mm PABBO BB-
PULPROG       zg30
TD            65536
SOLVENT       CDC13
NS            16
DS            2
SWH           8223.685 Hz
FIDRES        0.125483 Hz
AQ            3.9846387 sec
RG            228
DW            60.800 usec
DE            6.50 usec
TE            2952.0 K
D1            1.00000000 sec
TD0           1
```

```
===== CHANNEL f1 =====
NUC1          1H
P1            14.80 usec
PL1           -1.00 dB
PL1W          10.90985775 W
SF01          400.1724712 MHz
SI            32768
SF            400.1700158 MHz
WDW           no
SSB           0
LB            0.00 Hz
GB            0
PC            1.00
```

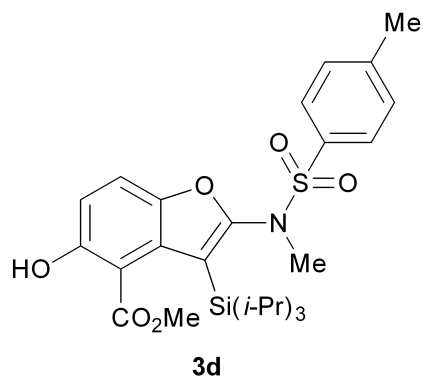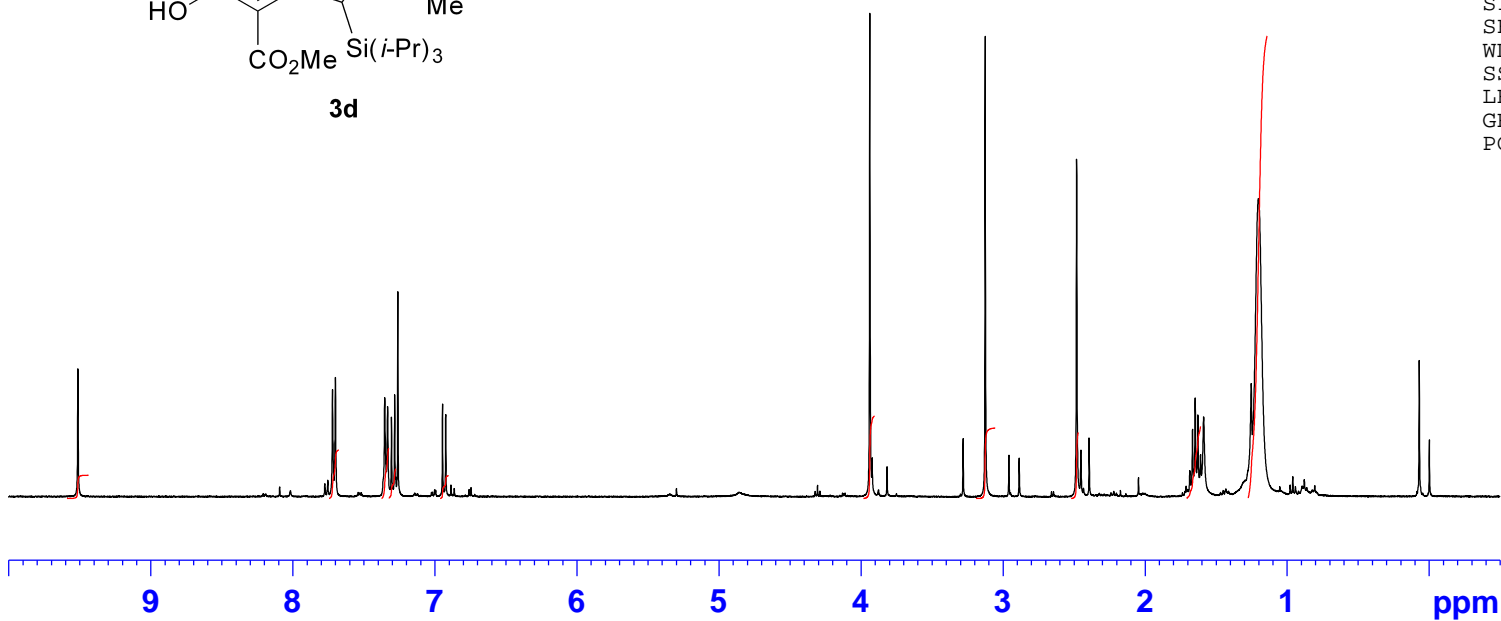

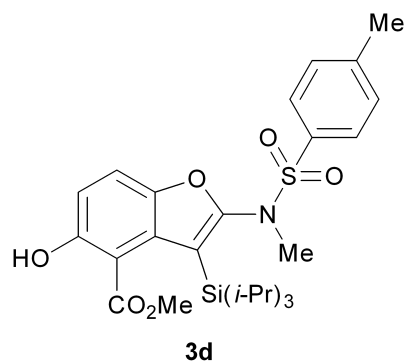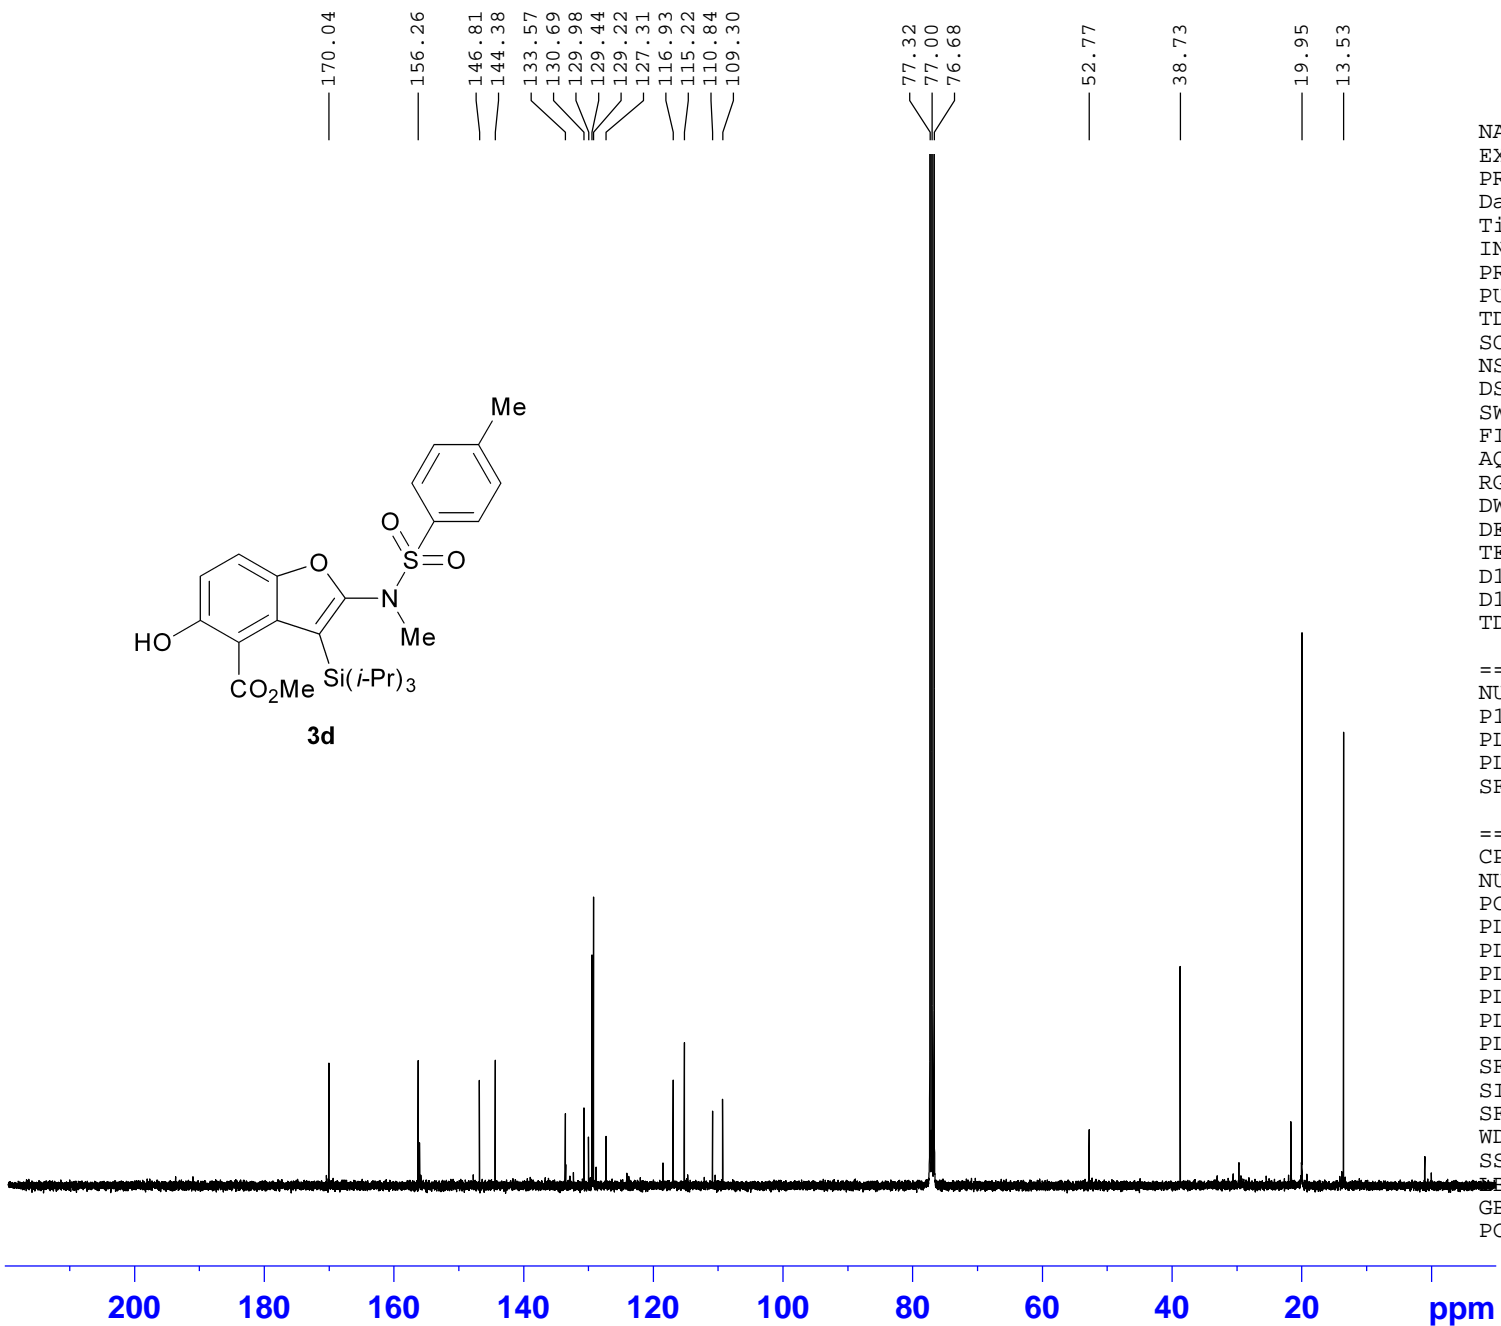

```

NAME          dz20
EXPNO         2018121806
PROCNO        1
Date_         20181219
Time          20.52
INSTRUM       spect
PROBHD        5 mm PABBO BB-
PULPROG       zgpg30
TD            65536
SOLVENT       CDC13
NS            15000
DS            4
SWH           24038.461 Hz
FIDRES        0.366798 Hz
AQ            1.3631988 sec
RG            2050
DW            20.800 usec
DE            6.50 usec
TE            2956.0 K
D1            2.00000000 sec
D11           0.03000000 sec
TD0           1

```

```

===== CHANNEL f1 =====
NUC1          13C
P1            9.90 usec
PL1           -1.10 dB
PL1W          40.29647064 W
SFO1          100.6328888 MHz

```

```

===== CHANNEL f2 =====
CPDPRG2       waltz16
NUC2          1H
PCPD2         90.00 usec
PL2           -1.00 dB
PL12          14.68 dB
PL13          17.68 dB
PL2W          10.90985775 W
PL12W         0.29499799 W
PL13W         0.14784923 W
SFO2          400.1716007 MHz
SI            32768
SF            100.6228304 MHz
WDW           no
SSB           0
GB            0.00 Hz
PC            1.40

```

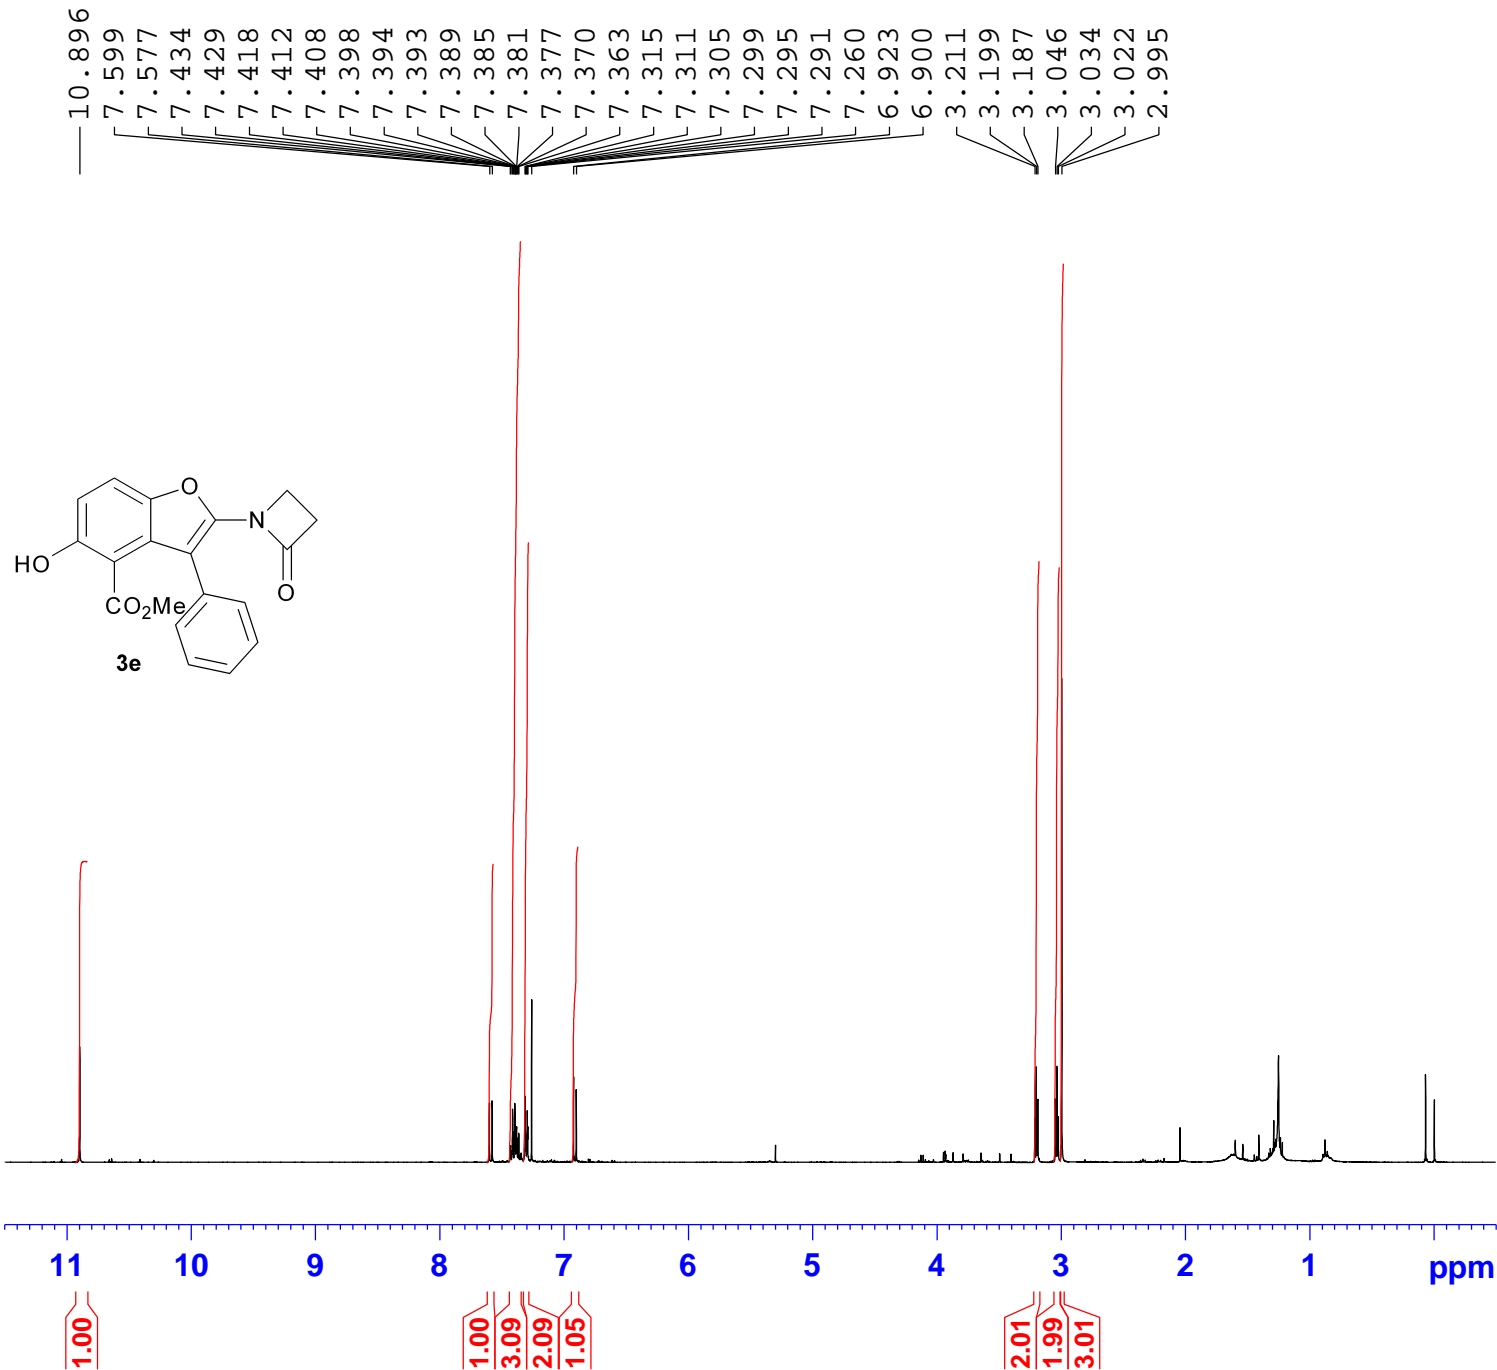

```

NAME          dz05
EXPNO         2018120501
PROCNO        1
Date_         20181205
Time          17.06
INSTRUM       spect
PROBHD        5 mm PABBO BB-
PULPROG       zg30
TD            65536
SOLVENT       CDC13
NS            16
DS            2
SWH           8223.685 Hz
FIDRES        0.125483 Hz
AQ            3.9846387 sec
RG            228
DW            60.800 usec
DE            6.50 usec
TE            2958.0 K
D1            1.00000000 sec
TD0           1
  
```

```

===== CHANNEL f1 =====
NUC1          1H
P1            14.80 usec
PL1           -1.00 dB
PL1W          10.90985775 W
SF01          400.1724712 MHz
SI            32768
SF            400.1700158 MHz
WDW           no
SSB           0
LB            0.00 Hz
GB            0
PC            1.00
  
```

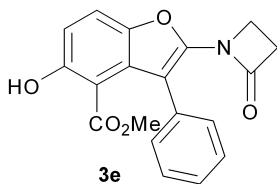

170.27  
164.06  
159.48  
145.90  
145.14  
133.58  
130.24  
127.74  
127.31  
126.82  
118.24  
113.80  
108.01  
104.36

77.31  
77.00  
76.68

50.81  
41.03  
37.98

```

NAME          dz05
EXPNO         2018120502
PROCNO        1
Date_         20181205
Time          17.13
INSTRUM       spect
PROBHD        5 mm PABBO BB-
PULPROG       zgpg30
TD            65536
SOLVENT       CDC13
NS            10000
DS            4
SWH           24038.461 Hz
FIDRES        0.366798 Hz
AQ            1.3631988 sec
RG            2050
DW            20.800 usec
DE            6.50 usec
TE            2959.0 K
D1            2.00000000 sec
D11           0.03000000 sec
TD0           1
  
```

```

===== CHANNEL f1 =====
NUC1          13C
P1            9.90 usec
PL1           -1.10 dB
PL1W          40.29647064 W
SFO1          100.6328888 MHz
  
```

```

===== CHANNEL f2 =====
CPDPRG2       waltz16
NUC2          1H
PCPD2         90.00 usec
PL2           -1.00 dB
PL12          14.68 dB
PL13          17.68 dB
PL2W          10.90985775 W
PL12W         0.29499799 W
PL13W         0.14784923 W
SFO2          400.1716007 MHz
SI            32768
SF            100.6228318 MHz
WDW           no
SSB           0
LB            0.00 Hz
GB            0
PC            1.40
  
```

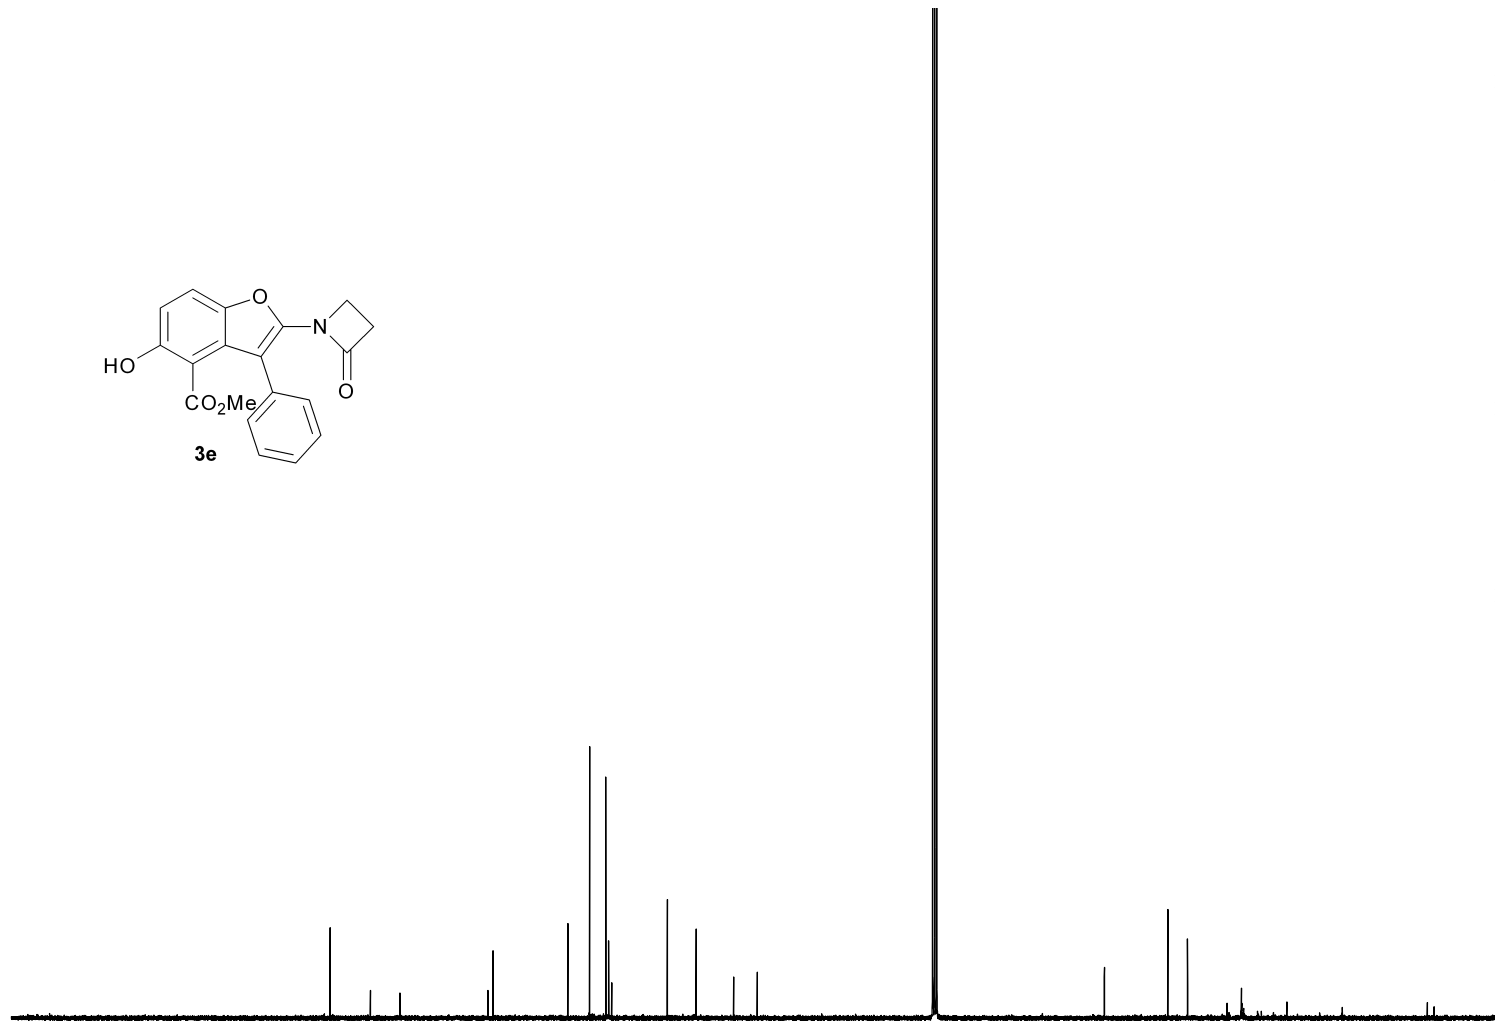

200 180 160 140 120 100 80 60 40 20 ppm

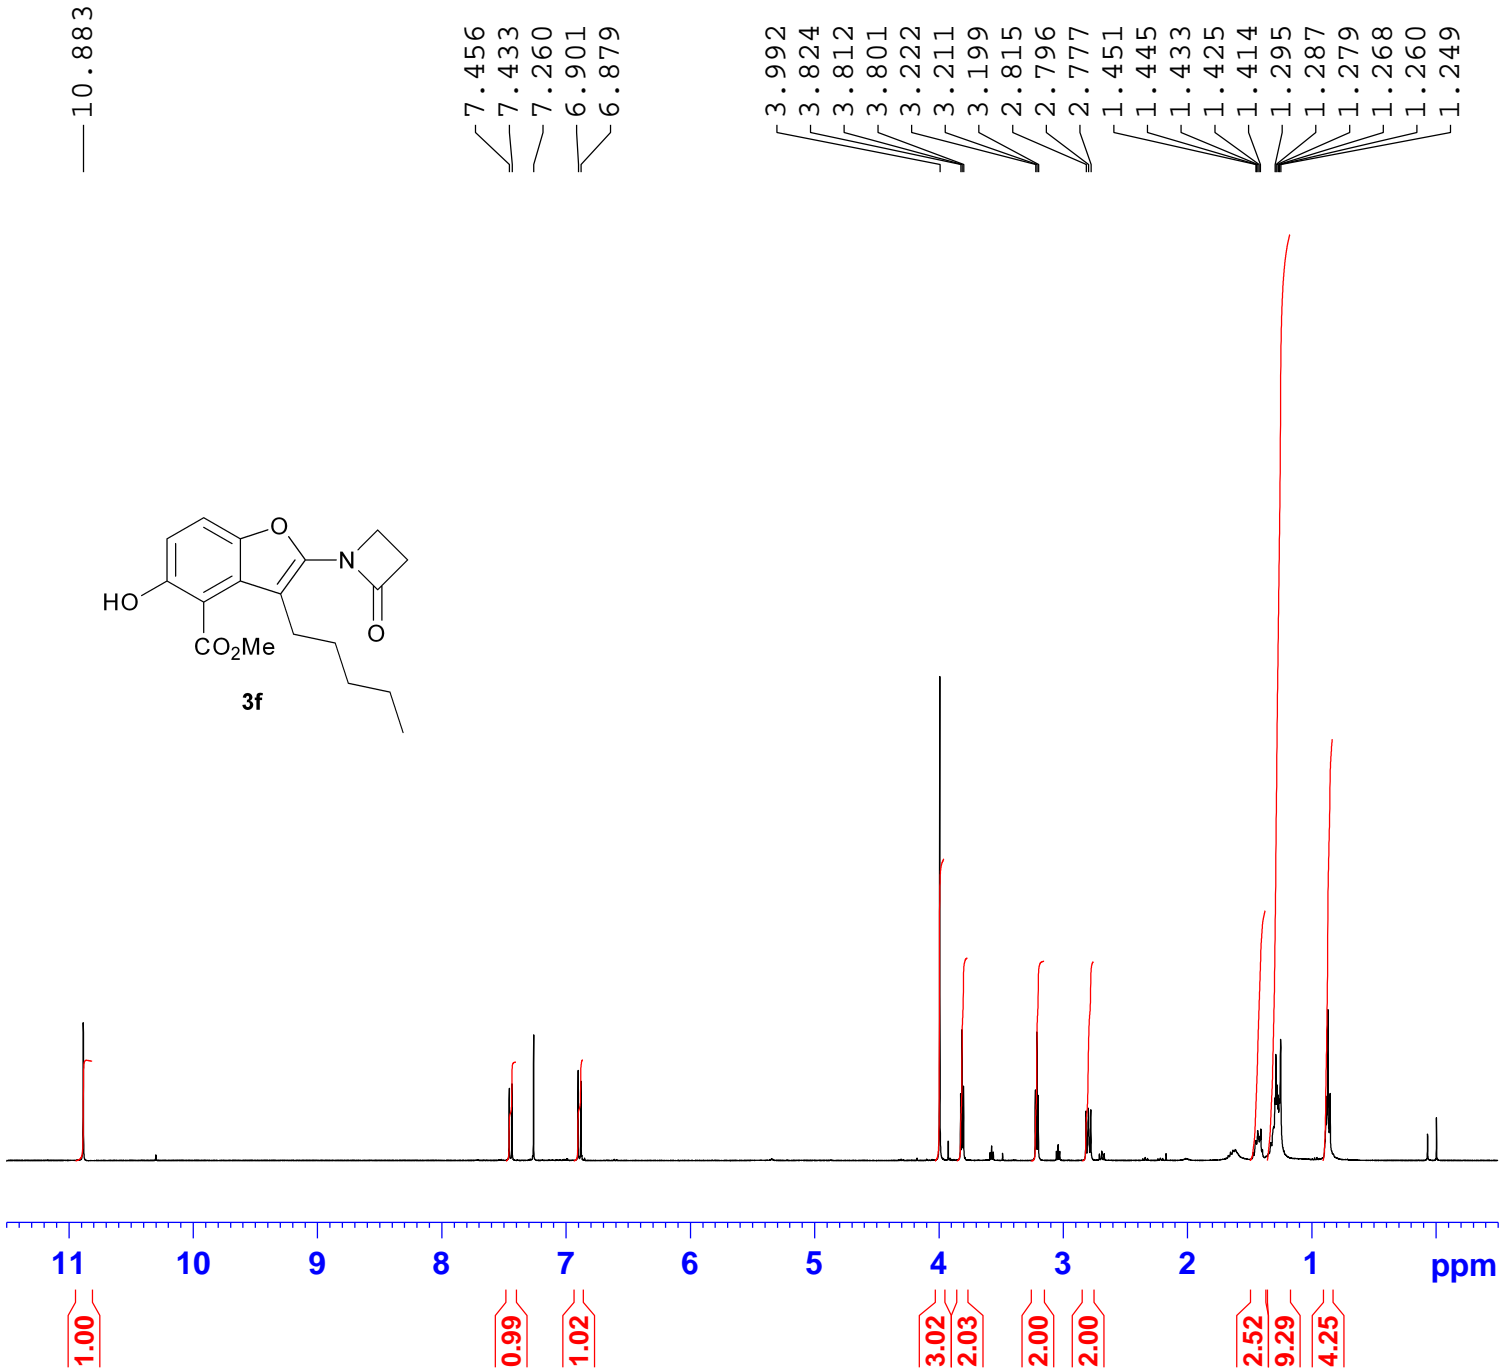

```

NAME          dz08
EXPNO         2018120801
PROCNO        1
Date_         20181208
Time          11.30
INSTRUM       spect
PROBHD        5 mm PABBO BB-
PULPROG       zg30
TD            65536
SOLVENT       CDC13
NS            16
DS            2
SWH           8223.685 Hz
FIDRES        0.125483 Hz
AQ            3.9846387 sec
RG            161
DW            60.800 usec
DE            6.50 usec
TE            2943.0 K
D1            1.00000000 sec
TD0           1

===== CHANNEL f1 =====
NUC1          1H
P1            14.80 usec
PL1           -1.00 dB
PL1W          10.90985775 W
SFO1          400.1724712 MHz
SI            32768
SF            400.1700158 MHz
WDW           no
SSB           0
LB            0.00 Hz
GB            0
PC            1.00

```

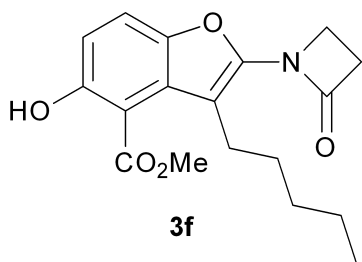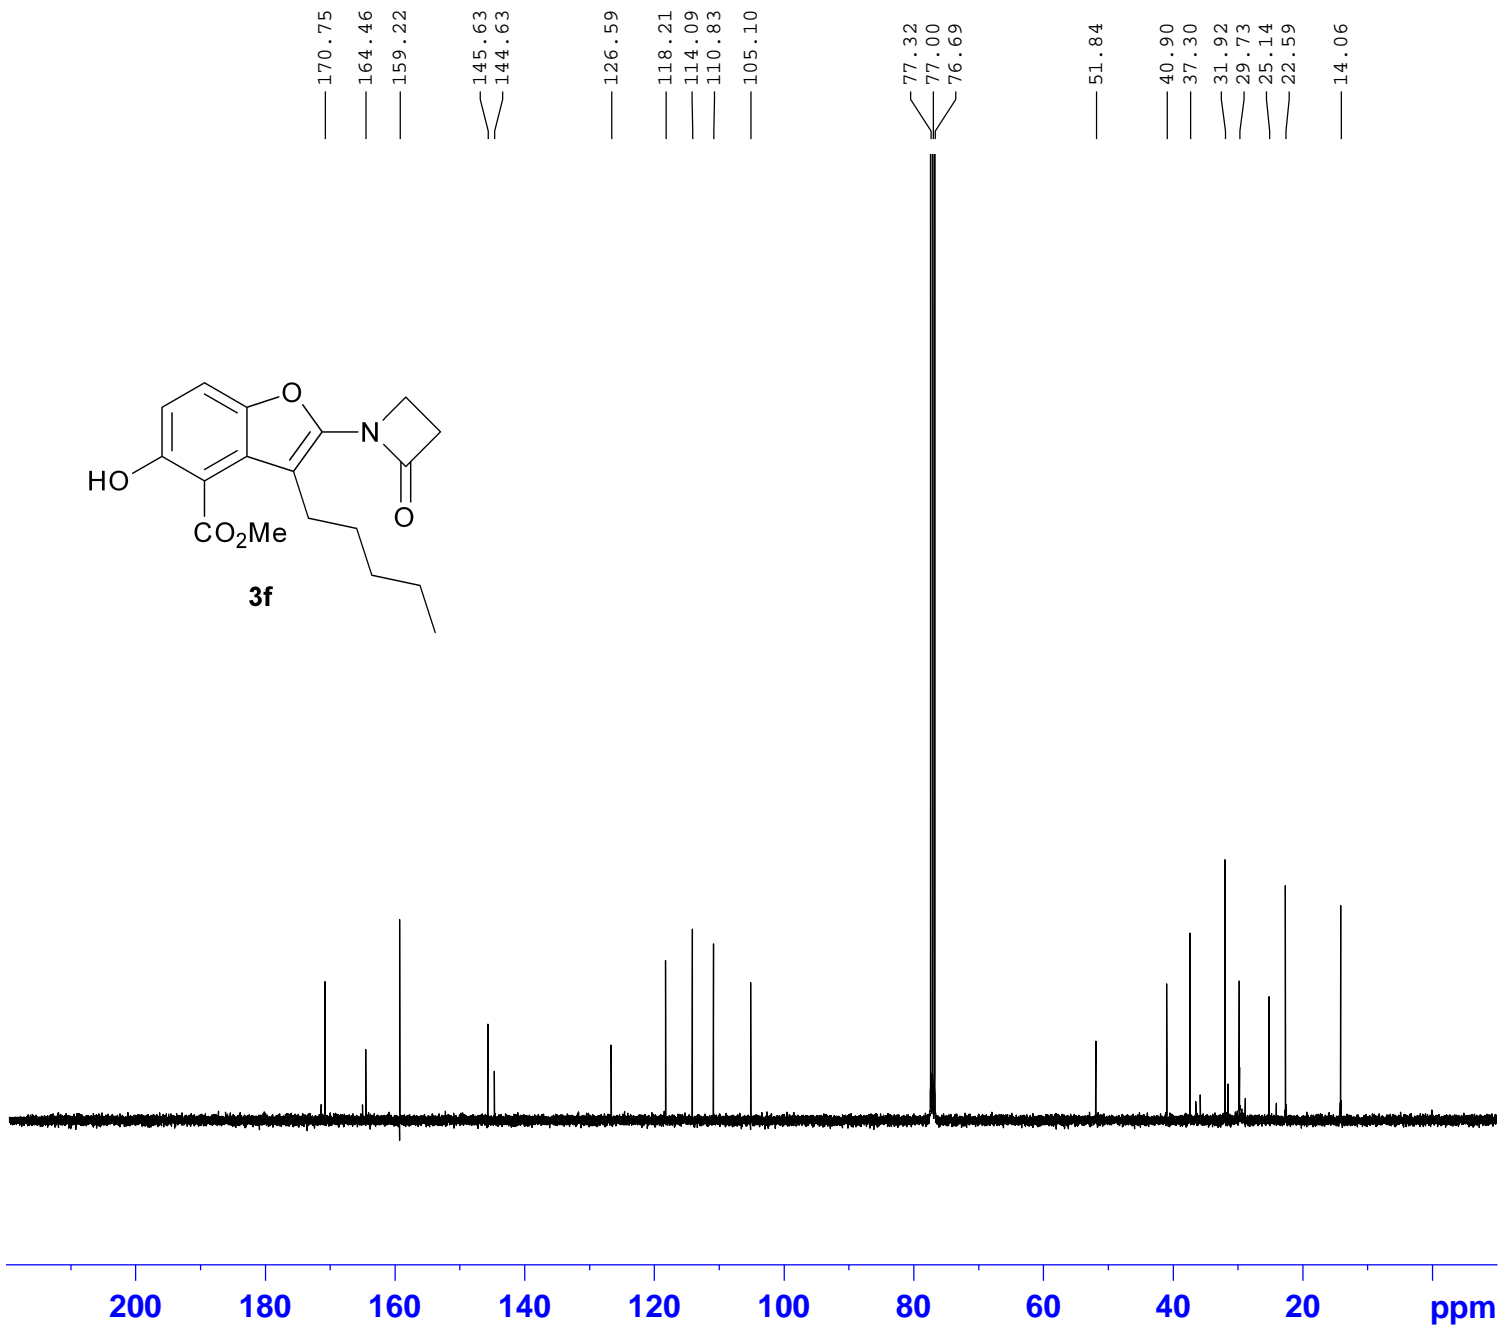

```

NAME          dz08
EXPNO         2018120802
PROCNO        1
Date_         20181208
Time          12.00
INSTRUM       spect
PROBHD        5 mm PABBO BB-
PULPROG       zgpg30
TD            65536
SOLVENT       CDCl3
NS            3794
DS            4
SWH           24038.461 Hz
FIDRES        0.366798 Hz
AQ            1.3631988 sec
RG            2050
DW            20.800 usec
DE            6.50 usec
TE            2943.0 K
D1            2.0000000 sec
D11           0.03000000 sec
TDO           1

```

```

===== CHANNEL f1 =====
NUC1          13C
P1            9.90 usec
PL1           -1.10 dB
PL1W          40.29647064 W
SFO1          100.6328888 MHz

```

```

===== CHANNEL f2 =====
CPDPRG2       waltz16
NUC2          1H
PCPD2         90.00 usec
PL2           -1.00 dB
PL12          14.68 dB
PL13          17.68 dB
PL2W          10.90985775 W
PL12W         0.29499799 W
PL13W         0.14784923 W
SFO2          400.1716007 MHz
SI            32768
SF            100.6228319 MHz
WDW           no
SSB           0
LB            0.00 Hz
GB            0
PC            1.40

```

8.159  
8.146  
8.143  
8.141  
7.686  
7.663  
7.601  
7.443  
7.438  
7.425  
7.421  
7.337  
7.334  
7.331  
7.327  
7.320  
7.316  
7.311  
7.302  
7.297  
7.292  
7.287  
7.284  
7.280  
7.276  
7.185  
7.181  
7.176  
7.165  
7.162  
7.104  
7.081  
3.862  
3.047

```

NAME          dz10
EXPNO         2018121301
PROCNO        1
Date_         20181213
Time          11.38
INSTRUM       spect
PROBHD        5 mm PABBO BB-
PULPROG       zg30
TD            65536
SOLVENT       CDC13
NS            16
DS            2
SWH           8223.685 Hz
FIDRES        0.125483 Hz
AQ            3.9846387 sec
RG            228
DW            60.800 usec
DE            6.50 usec
TE            2944.0 K
D1            1.00000000 sec
TD0           1
  
```

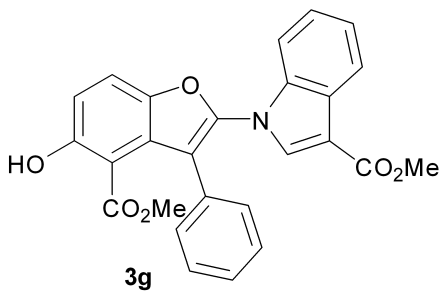

```

===== CHANNEL f1 =====
NUC1          1H
P1            14.80 usec
PL1           -1.00 dB
PL1W          10.90985775 W
SFO1          400.1724712 MHz
SI            32768
SF            400.1700156 MHz
WDW           no
SSB           0
LB            0.00 Hz
GB            0
PC            1.00
  
```

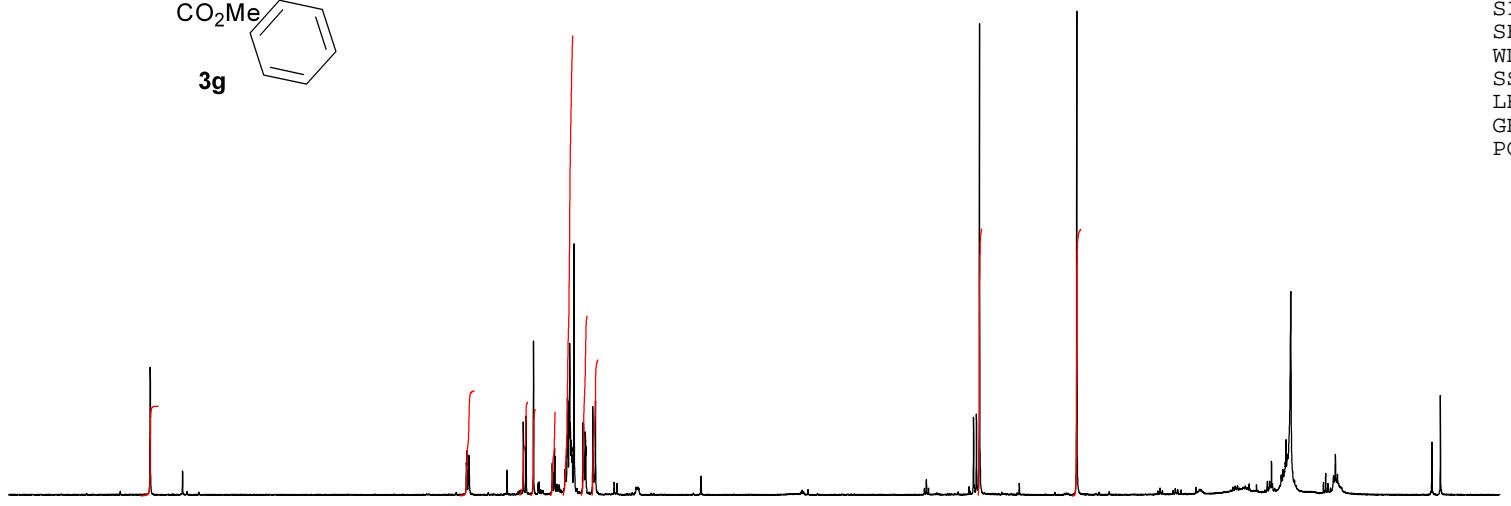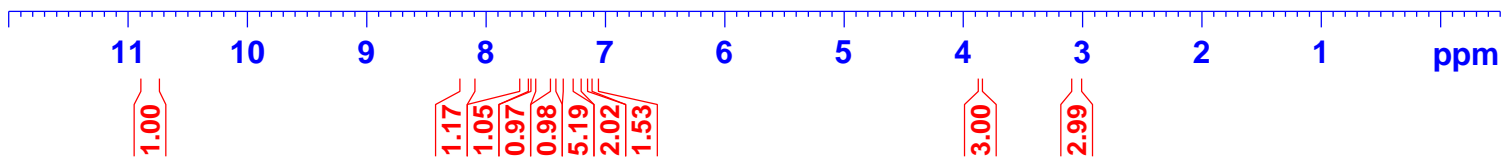



NAME dz10  
 EXPNO 2018121302  
 PROCNO 1  
 Date\_ 20181213  
 Time 15.25  
 INSTRUM spect  
 PROBHD 5 mm PABBO BB-  
 PULPROG zgpg30  
 TD 65536  
 SOLVENT CDC13  
 NS 10000  
 DS 4  
 SWH 24038.461 Hz  
 FIDRES 0.366798 Hz  
 AQ 1.3631988 sec  
 RG 2050  
 DW 20.800 usec  
 DE 6.50 usec  
 TE 2956.0 K  
 D1 2.0000000 sec  
 D11 0.03000000 sec  
 TD0 1

===== CHANNEL f1 =====  
 NUC1 13C  
 P1 9.90 usec  
 PL1 -1.10 dB  
 PL1W 40.29647064 W  
 SFO1 100.6328888 MHz

===== CHANNEL f2 =====  
 CPDPRG2 waltz16  
 NUC2 1H  
 PCPD2 90.00 usec  
 PL2 -1.00 dB  
 PL12 14.68 dB  
 PL13 17.68 dB  
 PL2W 10.90985775 W  
 PL12W 0.29499799 W  
 PL13W 0.14784923 W  
 SFO2 400.1716007 MHz  
 SI 32768  
 SF 100.6228311 MHz  
 WDW no  
 SSB 0  
 LB 0.00 Hz  
 GB 0  
 PC 1.40

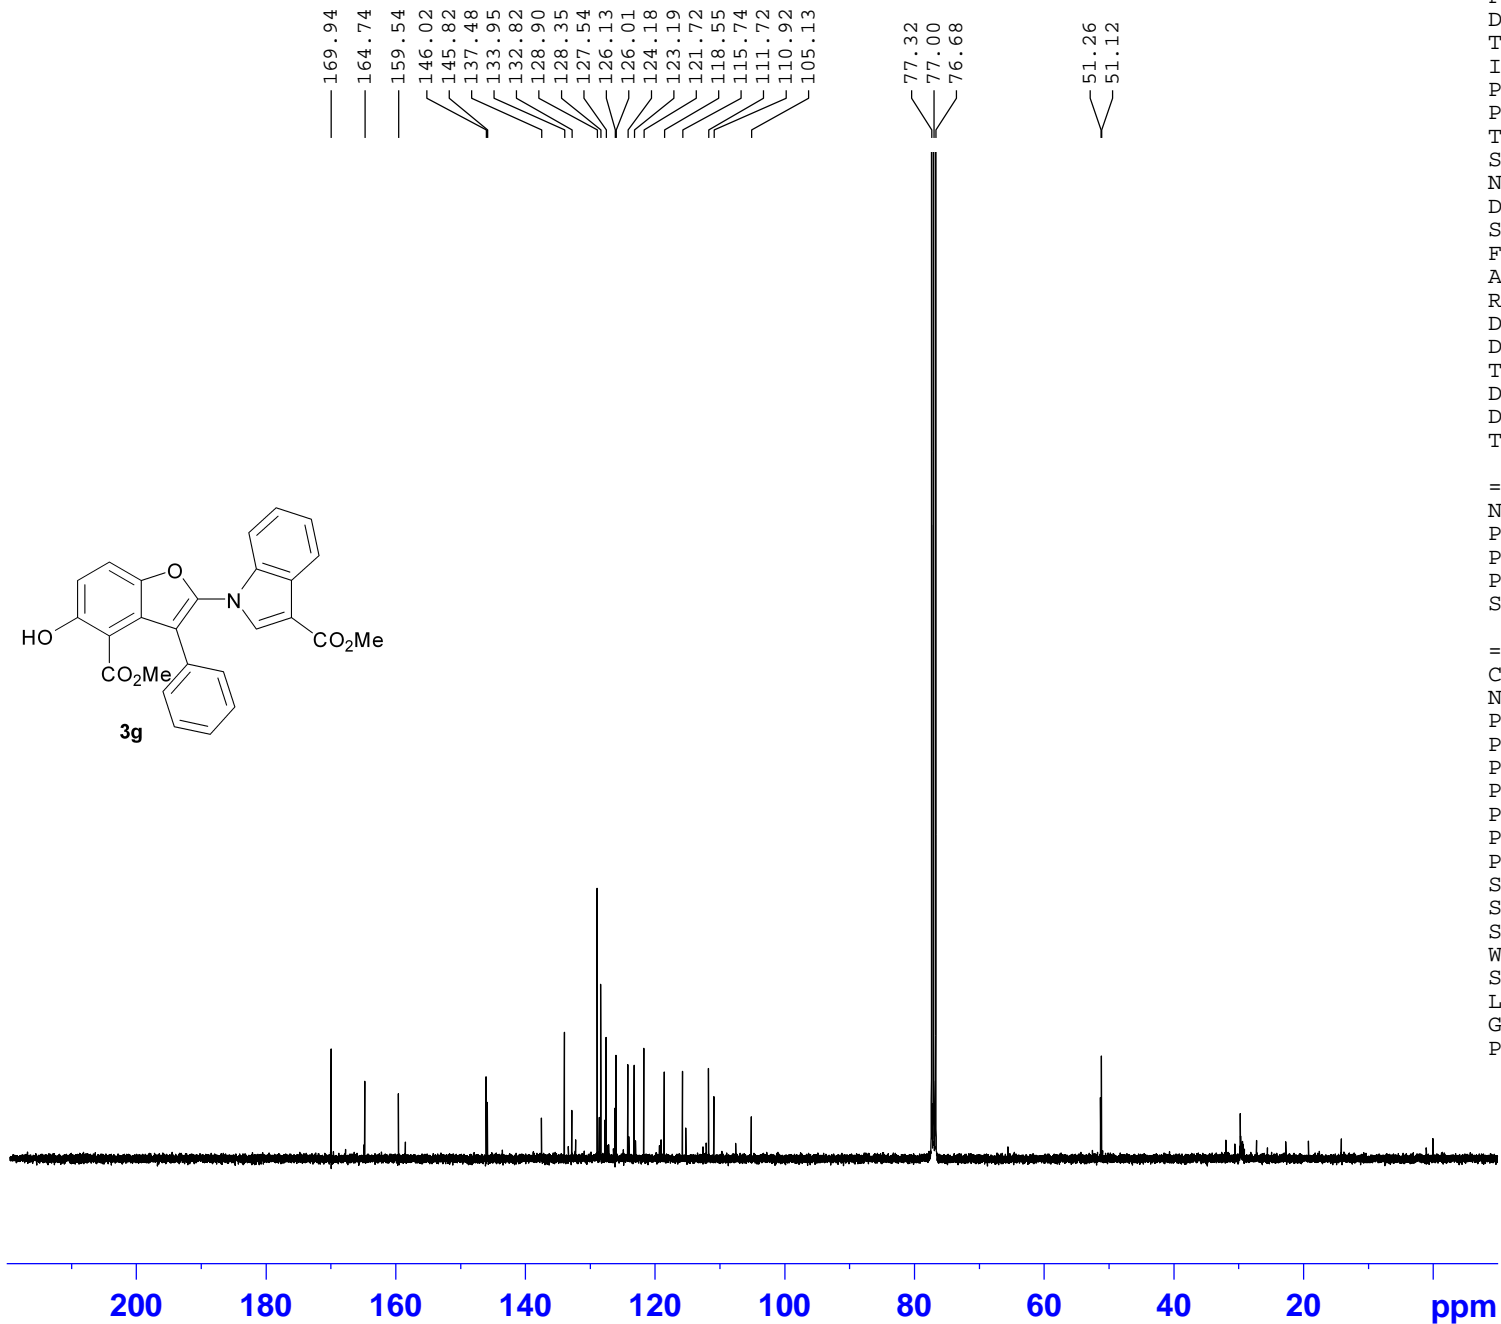

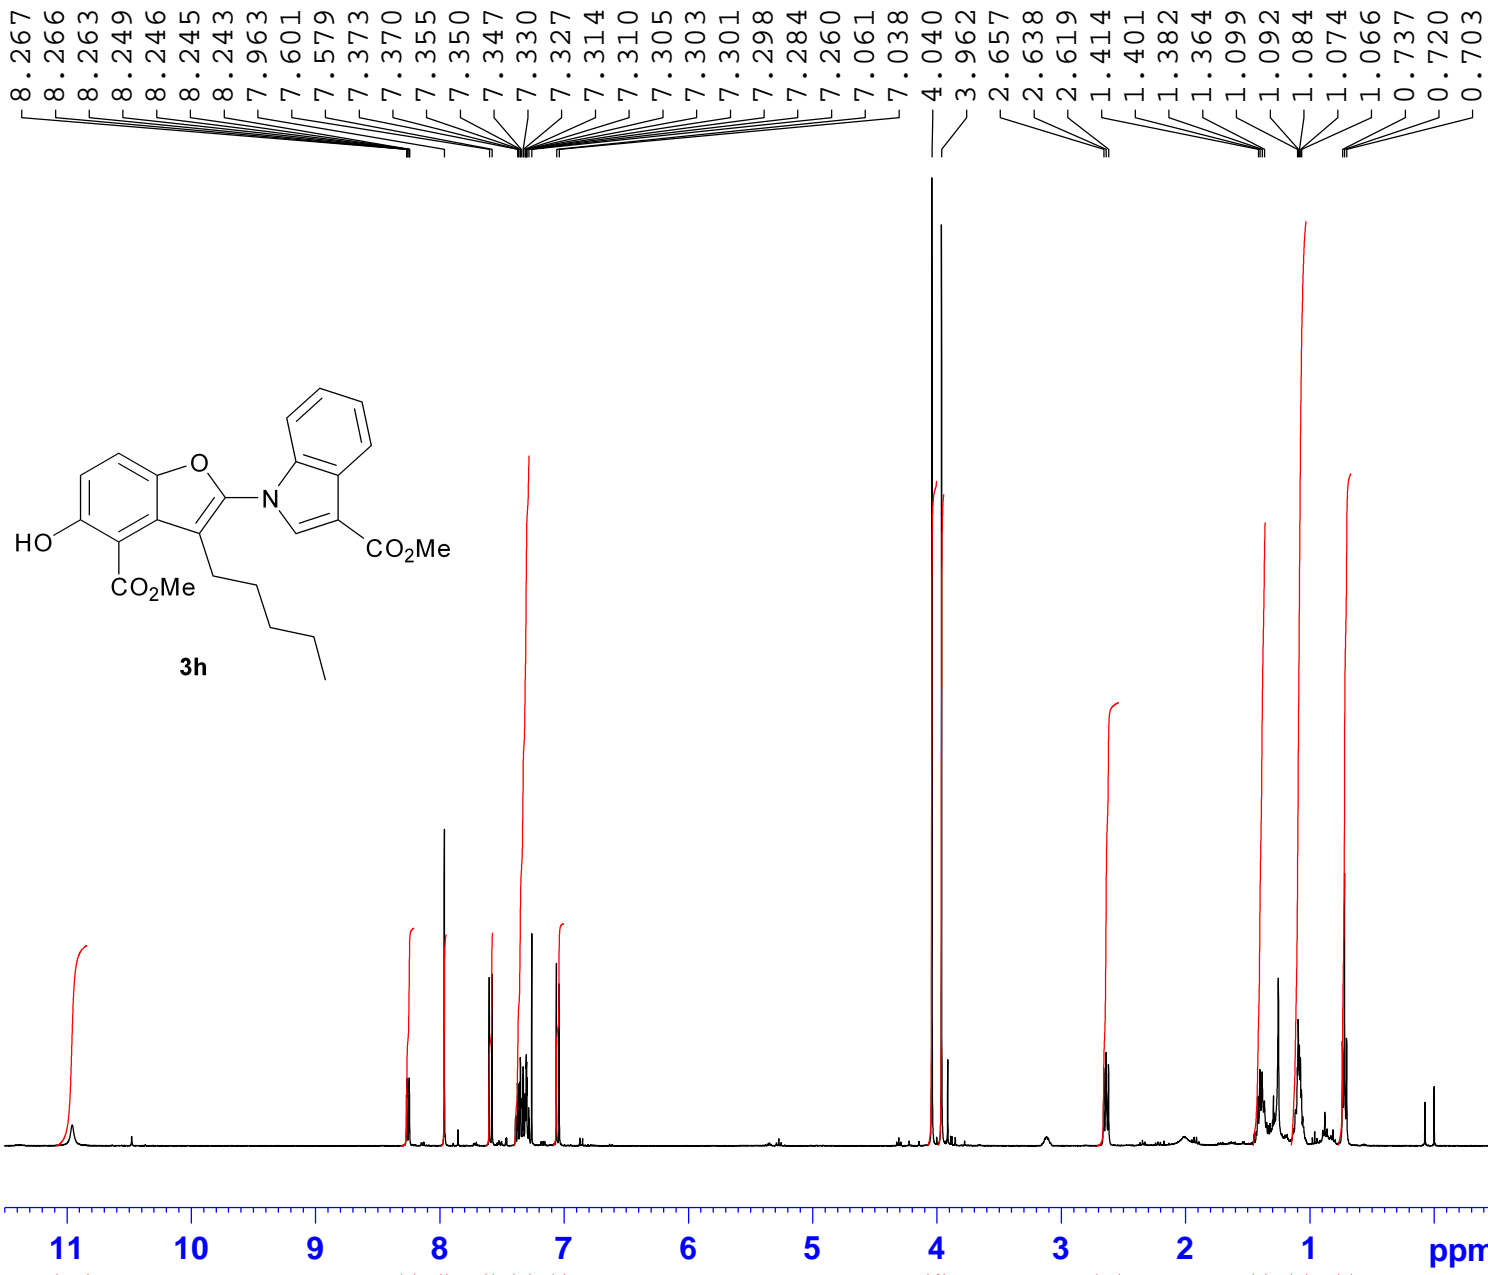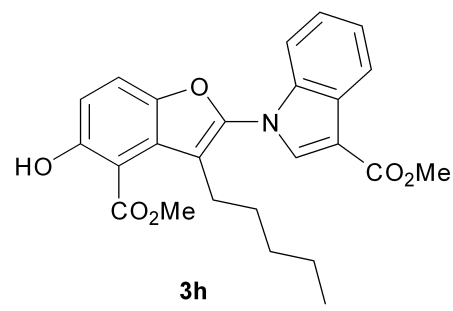

```

NAME          dz12
EXPNO         2018121301
PROCNO        1
Date_         20181213
Time          11.43
INSTRUM       spect
PROBHD        5 mm PABBO BB-
PULPROG       zg30
TD            65536
SOLVENT       CDCl3
NS            16
DS            2
SWH           8223.685 Hz
FIDRES        0.125483 Hz
AQ            3.9846387 sec
RG            181
DW            60.800 usec
DE            6.50 usec
TE            2946.0 K
D1            1.0000000 sec
TD0           1

===== CHANNEL f1 =====
NUC1          1H
P1            14.80 usec
PL1           -1.00 dB
PL1W          10.90985775 W
SFO1          400.1724712 MHz
SI            32768
SF            400.1700158 MHz
WDW           no
SSB           0
LB            0.00 Hz
GB            0
PC            1.00

```

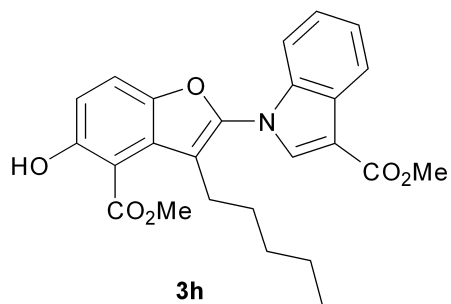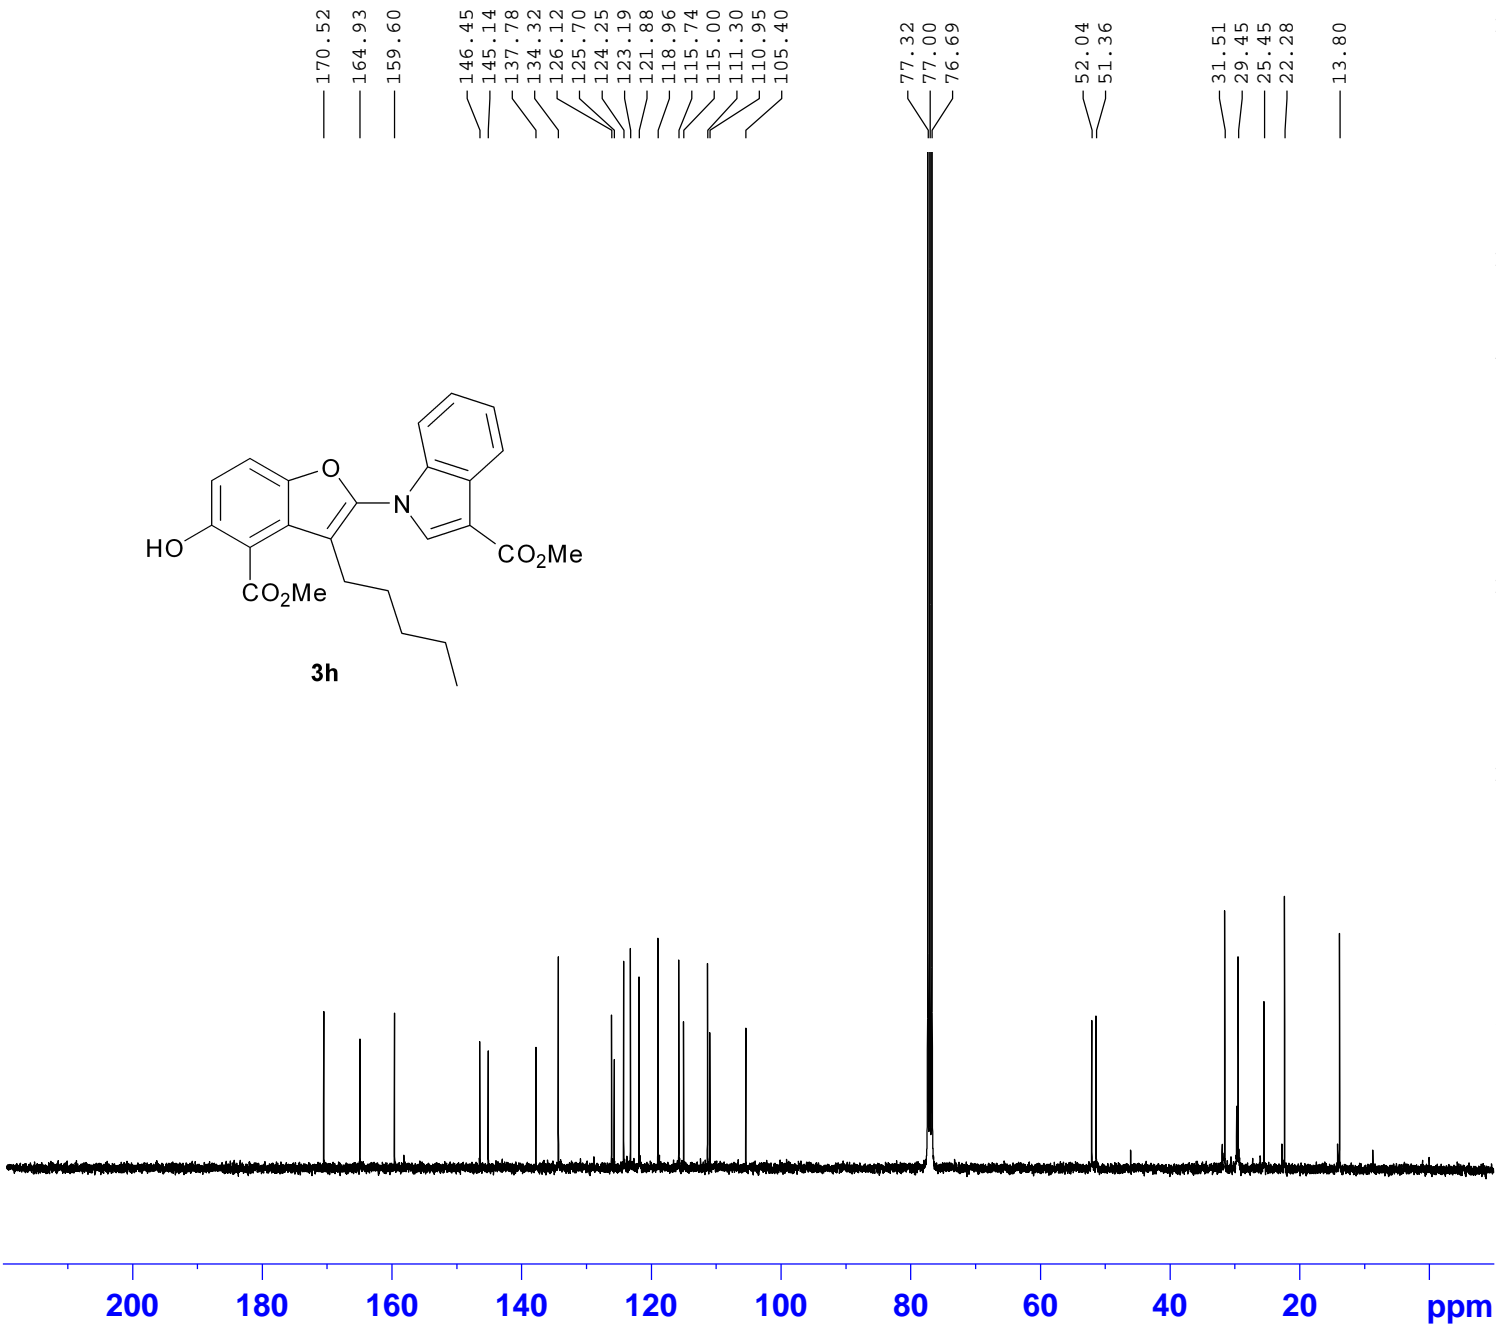

```

NAME          dz12
EXPNO         2018121302
PROCNO        1
Date_         20181213
Time          11.56
INSTRUM       spect
PROBHD        5 mm PABBO BB-
PULPROG       zgpg30
TD            65536
SOLVENT       CDC13
NS            3266
DS            4
SWH           24038.461 Hz
FIDRES        0.366798 Hz
AQ            1.3631988 sec
RG            2050
DW            20.800 usec
DE            6.50 usec
TE            2952.0 K
D1            2.00000000 sec
D11           0.03000000 sec
TD0           1
  
```

```

===== CHANNEL f1 =====
NUC1          13C
P1            9.90 usec
PL1           -1.10 dB
PL1W          40.29647064 W
SFO1          100.6328888 MHz
  
```

```

===== CHANNEL f2 =====
CPDPRG2       waltz16
NUC2          1H
PCPD2         90.00 usec
PL2           -1.00 dB
PL12          14.68 dB
PL13          17.68 dB
PL2W          10.90985775 W
PL12W         0.29499799 W
PL13W         0.14784923 W
SFO2          400.1716007 MHz
SI            32768
SF            100.6228319 MHz
WDW           EM
SSB           0
LB            1.00 Hz
GB            0
PC            1.40
  
```
